# Supplementary material
Source: publisher figshare collection journal article supplement (https://future-science-group.figshare.com/ndownloader/files/31606511)
Supplement: Supplementary file 1 [file 31606511]

gene	biotype	length	MCF7cyto	MCF7nuc	MDAMB231cyto	MDAMB231nuc
AG-ALUconcensus	ALU	282	11825.3901	17776.74254	12530.29937	17868.5495
AL662907.3	lincRNA	32	2.592908223	6.183931775	0	3.102717399
LINC00824	lincRNA	57	0	1.030655296	1.022547688	1.551358699
AL360157.1	lincRNA	87	3.457210964	5.153276479	5.112738439	5.429755448
LY6E-DT	lincRNA	88	0	0	0	0
AC018761.1	lincRNA	97	572.1684146	1254.307495	575.6943482	1088.278128
HCG9	lincRNA	101	0	5.153276479	1.022547688	6.981114147
AC239803.1	lincRNA	101	2.592908223	0	0	0.77567935
hsa-mir-1253	lincRNA	105	0	1.030655296	3.067643063	1.551358699
SNHG25	lincRNA	106	263.612336	194.7938509	206.5546329	76.01657627
AC011518.1	lincRNA	108	0	1.030655296	0	0
LINC00511	lincRNA	1924	19.0146603	51.53276479	33.7440737	48.09211968
AL162413.1	lincRNA	110	18.15035756	6.183931775	1.022547688	0.77567935
AC007405.1	lincRNA	243	880.7244931	1423.334963	765.8882182	1224.022014
AL121885.3	lincRNA	115	0	3.091965887	1.022547688	1.551358699
AC015726.2	lincRNA	122	0	0	0	0
AL109933.1	lincRNA	414	3.457210964	10.30655296	4.090190751	4.654076098
AL132712.2	lincRNA	127	0	0	0	0
LINC02193	lincRNA	129	6.050119187	2.061310592	2.045095376	3.102717399
AC097717.1	lincRNA	1808	19.87896304	36.07293535	25.56369219	35.68125008
AL162399.1	lincRNA	130	57.04398091	162.8435367	108.3900549	117.1275818
AL392172.1	lincRNA	346	6.914421928	7.214587071	24.54114451	0.77567935
MALAT1	lincRNA	366	953.3259234	12505.97136	217.8026575	1107.670111
AL360181.4	lincRNA	134	0	0	0	0.77567935
AC106892.1	lincRNA	138	0	0	0	0
LINC02276	lincRNA	138	0	1.030655296	0	0
AL353803.5	lincRNA	141	4.321513705	5.153276479	0	0
AL139220.2	lincRNA	418	145.2028605	399.8942548	131.9086517	266.0580169
AC004448.2	lincRNA	143	0	1.030655296	0	0
TEX41	lincRNA	334	0.864302741	4.122621183	1.022547688	5.429755448
AC069503.3	lincRNA	145	0	1.030655296	0	1.551358699
EPHA5-AS1	lincRNA	146	0	1.030655296	0	0
AL109914.1	lincRNA	146	1.728605482	0	0	0.77567935
AC009055.2	lincRNA	146	0	4.122621183	0	3.102717399
AC079610.3	lincRNA	147	0.864302741	3.091965887	1.022547688	1.551358699
LINC01943	lincRNA	149	0	0	6.135286127	1.551358699
LINC01358	lincRNA	152	0	0	9.20292919	3.878396748
AC068295.1	lincRNA	153	49.26525624	127.8012567	25.56369219	81.44633172
AC098479.1	lincRNA	154	0	0	0	0.77567935
AC073140.1|AG-RNY5	lincRNA	156	4900.596542	123.6786355	6232.428157	141.1736416
AL162400.2	lincRNA	157	0.864302741	0	0	0.77567935
AL135790.1	lincRNA	157	6312.002918	11306.28859	5631.170117	6886.481266
AC090796.1	lincRNA	157	4.321513705	6.183931775	0	0.77567935
AL356277.3	lincRNA	158	0	3.091965887	1.022547688	0.77567935
LINC01378	lincRNA	323	0.864302741	0	0	4.654076098
LINC01220	lincRNA	159	0	0	2.045095376	0
AL356580.1	lincRNA	159	0	3.091965887	1.022547688	0
AC099566.1	lincRNA	159	0	0	0	0
LINC01606	lincRNA	359	20.74326579	76.26849189	22.49604913	62.83002732
AC046143.2	lincRNA	160	0	0	0	1.551358699
AL513008.1	lincRNA	161	0	0	0	0
AC025166.1	lincRNA	163	2.592908223	3.091965887	2.045095376	3.878396748
AC011509.1	lincRNA	164	0.864302741	1.030655296	0	0.77567935
AC114501.3	lincRNA	164	0	0	0	1.551358699
LINC01676	lincRNA	442	0.864302741	0	0	0
CASC19	lincRNA	165	0.864302741	1.030655296	2.045095376	1.551358699
AC044839.3	lincRNA	166	0	0	0	0
TTTY17C|TTTY17A|TTTY17B	lincRNA	166	0	0	1.022547688	0
AC007422.2	lincRNA	167	0	0	3.067643063	40.33532618
AL121781.1	lincRNA	168	0	2.061310592	0	0
AL138767.2	lincRNA	168	0	1.030655296	1.022547688	2.327038049
AL669831.5	lincRNA	168	0.864302741	11.33720825	1.022547688	4.654076098
AP001029.1	lincRNA	168	103.7163289	161.8128814	88.96164884	161.3413047
AC008667.4	lincRNA	168	0	1.030655296	0	0
AL365205.3	lincRNA	169	1.728605482	8.245242366	3.067643063	3.102717399
LINC02301	lincRNA	169	0.864302741	3.091965887	1.022547688	2.327038049
AC124067.1	lincRNA	169	1.728605482	2.061310592	0	2.327038049
AL592431.2	lincRNA	171	0.864302741	2.061310592	3.067643063	2.327038049
AC073218.1	lincRNA	171	5.185816446	11.33720825	2.045095376	16.28926634
AC243960.9	lincRNA	172	0	1.030655296	0	0
AC087741.2	lincRNA	172	2.592908223	3.091965887	2.045095376	0.77567935
AL138895.1	lincRNA	173	0.864302741	4.122621183	0	0
AC011445.2	lincRNA	173	6.914421928	2.061310592	14.31566763	0.77567935
AC096637.1	lincRNA	174	1.728605482	3.091965887	9.20292919	10.8595109
AC078960.1	lincRNA	177	0	5.153276479	0	0.77567935
AC021683.2	lincRNA	177	197.9253277	293.7367593	143.1566763	230.3767669
LINC02558	lincRNA	476	44.94374253	79.36045778	20.45095376	82.22201107
AC024559.2	lincRNA	178	2.592908223	1.030655296	1.022547688	0
AP003097.2	lincRNA	178	0.864302741	2.061310592	0	0
AC068880.3	lincRNA	179	0.864302741	0	0	0
AC091027.2	lincRNA	179	0	0	0	0
AC015813.4	lincRNA	179	1.728605482	0	1.022547688	3.102717399
AC011516.1	lincRNA	180	0	3.091965887	0	0
AC073316.1	lincRNA	181	1.728605482	0	1.022547688	1.551358699
AFDN-DT	lincRNA	182	0	1.030655296	7.157833815	0.77567935
AL356364.1	lincRNA	182	0	0	0	0
AL031674.1	lincRNA	182	3.457210964	4.122621183	1.022547688	3.878396748
C8orf37-AS1	lincRNA	183	0	0	1.022547688	0
LINC00598	lincRNA	183	0	0	0	0
LINC01237	lincRNA	184	0.864302741	5.153276479	2.045095376	7.756793497
AC079466.2	lincRNA	185	3.457210964	0	0	0
AC015911.9	lincRNA	185	2909.243026	6689.983525	3198.529167	5678.748519
AC129915.2	lincRNA	185	0	0	1.022547688	0
AC087518.1	lincRNA	187	0	0	0	0.77567935
AL355300.1	lincRNA	187	0.864302741	0	1.022547688	3.102717399
LINC01435	lincRNA	187	0	3.091965887	1.022547688	1.551358699
LINC02559	lincRNA	188	0	6.183931775	1.022547688	3.878396748
AC007450.1	lincRNA	188	1.728605482	0	1.022547688	0.77567935
LINC01586	lincRNA	189	4.321513705	10.30655296	12.27057225	7.756793497
AC007631.1	lincRNA	189	0	1.030655296	3.067643063	0.77567935
MIR99AHG	lincRNA	189	6.914421928	13.39851885	4.090190751	16.28926634
AL139161.1	lincRNA	190	1.728605482	9.275897662	3.067643063	7.756793497
AC005014.3	lincRNA	190	30.25059594	10.30655296	8.180381502	15.51358699
AC009930.1	lincRNA	191	6.914421928	5.153276479	7.157833815	10.08383155
AC007953.2	lincRNA	193	0	3.091965887	4.090190751	3.102717399
AL354994.1	lincRNA	194	0	1.030655296	1.022547688	1.551358699
AC004982.2	lincRNA	442	3.457210964	22.67441651	1.022547688	6.205434797
AC140912.1	lincRNA	194	0.864302741	0	1.022547688	1.551358699
LINC00508	lincRNA	194	0	1.030655296	0	0
LINC01194	lincRNA	195	14.6931466	55.65538597	25.56369219	74.46521757
AC004702.1	lincRNA	195	1744.162931	3017.758706	1780.255524	2645.066582
LINC02662	lincRNA	196	0	0	0	0
AL139317.1	lincRNA	196	1732.926996	2743.604397	1685.158589	2351.084109
CR381653.1	lincRNA	456	8.64302741	14.42917414	9.20292919	7.756793497
AL135923.1	lincRNA	196	0	2.061310592	0	0.77567935
AC242019.1	lincRNA	196	0	0	1.022547688	0.77567935
AL356010.2	lincRNA	197	3.457210964	14.42917414	2.045095376	3.102717399
AL158828.1	lincRNA	197	2.592908223	8.245242366	1.022547688	3.878396748
AL356421.2	lincRNA	197	0	0	0	0
AC012307.1	lincRNA	197	0	1.030655296	0	0
LINC02255	lincRNA	199	2.592908223	2.061310592	3.067643063	6.205434797
AC245595.1	lincRNA	467	40.62222883	22.67441651	237.2310636	65.93274472
LINC01605	lincRNA	199	2.592908223	0	11.24802457	10.8595109
LINC01866	lincRNA	201	3.457210964	10.30655296	0	3.878396748
AC025366.1	lincRNA	202	176.3177592	154.5982944	66.46559971	98.51127741
AC012593.1	lincRNA	202	0.864302741	0	0	0
AC079760.1	lincRNA	202	0	0	0	0
ISX-AS1	lincRNA	202	0.864302741	0	0	0
AC078850.2	lincRNA	203	0	2.061310592	0	0
LINC02028	lincRNA	712	0	3.091965887	0	1.551358699
AC024681.2	lincRNA	204	107.1735399	188.6099191	89.98419653	182.2846472
AC110597.4	lincRNA	204	0	0	5.112738439	0
AL353747.2	lincRNA	205	0	0	0	0.77567935
AL353614.1	lincRNA	206	0	1.030655296	0	1.551358699
AC018752.1	lincRNA	206	0	4.122621183	2.045095376	3.878396748
SMIM10L1	lincRNA	207	68.27991654	52.56342009	37.83426445	27.14877724
AP005530.1|AC215217.1	lincRNA	207	0	0	0	0
LINC02309	lincRNA	207	73.46573299	161.8128814	61.35286127	101.6139948
LINC01509	lincRNA	207	1.728605482	5.153276479	0	1.551358699
LINC01934	lincRNA	207	6.050119187	15.45982944	6.135286127	12.41086959
AL132819.1	lincRNA	208	0	0	0	0
AL133264.2	lincRNA	209	0	1.030655296	0	0
AC021979.2	lincRNA	209	0	0	1.022547688	0
AL355512.1	lincRNA	209	0	1.030655296	1.022547688	0
LINC02356	lincRNA	209	0.864302741	1.030655296	2.045095376	5.429755448
AP001803.4	lincRNA	209	0.864302741	26.79703769	1.022547688	25.59741854
AC091705.1	lincRNA	209	0	1.030655296	0	0.77567935
LINC00363	lincRNA	210	1.728605482	0	0	0.77567935
AC090457.1	lincRNA	211	0	2.061310592	4.090190751	4.654076098
AL133371.3	lincRNA	212	0	0	0	0
AC134312.3	lincRNA	213	0	0	0	0
AC074052.2	lincRNA	214	28.52199045	130.8932226	32.72152601	111.6978264
AC091979.2	lincRNA	214	0	0	0	0
LINC02366	lincRNA	214	0	1.030655296	0	0
AC012668.3	lincRNA	214	3.457210964	5.153276479	1.022547688	2.327038049
AC108067.1	lincRNA	215	114.0879618	357.6373876	102.2547688	211.7604625
AL355526.1	lincRNA	215	0	1.030655296	0	0
AC080013.6	lincRNA	215	375.9716924	767.8381954	255.6369219	601.151496
FAM27E5	lincRNA	216	0	2.061310592	9.20292919	3.878396748
LINC00305	lincRNA	217	0	0	0	0
FOCAD-AS1	lincRNA	217	0.864302741	4.122621183	2.045095376	1.551358699
AP000477.1	lincRNA	217	1117.543444	1699.550583	1128.892647	1318.654894
AL451048.1	lincRNA	217	0	3.091965887	3.067643063	0.77567935
LINC01797	lincRNA	218	0	0	0	2.327038049
AC105277.1	lincRNA	219	0	0	1.022547688	4.654076098
AC005537.1	lincRNA	219	1.728605482	1.030655296	0	1.551358699
LINC01549	lincRNA	219	57.90828365	184.4872979	58.2852182	129.5384514
AL358117.1	lincRNA	219	0	0	0	0
AC010183.2	lincRNA	219	0	0	0	0
RB1-DT	lincRNA	220	0	0	6.135286127	0
LINC00929	lincRNA	220	0	0	0	0
NFIA-AS1	lincRNA	465	0	0	0	3.878396748
PVT1	misc_RNA	1129	162.4889153	245.2959604	103.2773165	61.27866862
AC138466.3	lincRNA	221	0	0	0	0
AC093458.1	lincRNA	222	0	1.030655296	0	3.102717399
AC018697.1	lincRNA	223	0	0	0	0.77567935
LINC00987	lincRNA	224	0.864302741	0	0	0
AL353742.1	lincRNA	224	0.864302741	9.275897662	2.045095376	0.77567935
LINC02106	lincRNA	225	0.864302741	2.061310592	1.022547688	0.77567935
AP003900.1	lincRNA	225	0	0	0	6.205434797
AC207480.1	lincRNA	226	0	0	0	0
CR392039.3	lincRNA	227	0.864302741	0	0	0.77567935
LINC00428	lincRNA	227	0.864302741	3.091965887	2.045095376	9.308152196
AC104211.2	lincRNA	227	4.321513705	4.122621183	2.045095376	2.327038049
IQCH-AS1	lincRNA	228	4175.446542	7586.653632	5246.692186	7442.64336
LINC01471	lincRNA	228	0	0	0	0
AC012668.1	lincRNA	228	0	0	0	0
MUC20-OT1	lincRNA	229	0	0	4.090190751	0
AC092919.1	lincRNA	229	0	0	0	2.327038049
MUC20-OT1|MUC20-OT1|MUC20-OT1|MUC20-OT1|MUC20-OT1|MUC20-OT1|MUC20-OT1	lincRNA	229	3.457210964	7.214587071	8.180381502	2.327038049
AC004869.2	lincRNA	229	1.728605482	0	0	0
LINC01176	lincRNA	230	9.507330152	10.30655296	0	0
LINC00944	lincRNA	231	0	0	0	0
LY6E-DT|LY6E-DT	lincRNA	231	4.321513705	2.061310592	1.022547688	3.102717399
AP003400.1	lincRNA	231	0	1.030655296	0	0.77567935
AC092783.1	lincRNA	231	0.864302741	0	1.022547688	0.77567935
AC013248.1	lincRNA	232	16.42175208	20.61310592	21.47350144	16.28926634
AC005695.3	lincRNA	232	0.864302741	0	0	0.77567935
LINC02240|AC109471.2	lincRNA	233	0	0	0	0
AL133372.2	lincRNA	233	299.0487484	264.878411	41.9244552	103.9410329
AL365434.2	lincRNA	234	4.321513705	24.7357271	5.112738439	10.08383155
MIRLET7A1HG	lincRNA	235	7.778724669	18.55179532	4.090190751	2.327038049
CDC37L1-DT	lincRNA	235	5.185816446	2.061310592	3.067643063	0.77567935
AP001059.3	lincRNA	235	0	1.030655296	0	0
PIGY-DT	lincRNA	235	0	0	0	0
LINC00877	lincRNA	235	0	1.030655296	0	0
LINC01060|LINC01060	lincRNA	236	0	0	0	0
AC092168.1	lincRNA	236	0	0	0	0
AL596275.2	lincRNA	236	0	0	0	0
LINC02112	lincRNA	236	0	1.030655296	0	0
AC016735.1	lincRNA	237	2.592908223	4.122621183	1.022547688	10.08383155
AL445623.1	lincRNA	237	0.864302741	0	0	0
LINC01938	lincRNA	237	0	6.183931775	0	0.77567935
AL442638.1	lincRNA	237	0	0	0	0.77567935
AC009522.1	lincRNA	238	1.728605482	0	0	0
LINC02100	lincRNA	238	2.592908223	1.030655296	3.067643063	3.102717399
AC110767.1	lincRNA	239	0	2.061310592	0	0
AC017002.3	lincRNA	239	19.87896304	45.34883301	28.63133526	126.435734
LINC02205	lincRNA	239	1.728605482	4.122621183	0	3.878396748
AL158211.3	lincRNA	239	1.728605482	1.030655296	3.067643063	0.77567935
AC023669.2	lincRNA	239	0	12.36786355	0	2.327038049
AC011524.1	lincRNA	240	48.4009535	142.2304308	28.63133526	95.40856001
AC137590.2	lincRNA	240	0	2.061310592	0	0.77567935
SNHG1	lincRNA	240	75.19433847	156.659605	186.1036792	262.1796202
AC093772.1	lincRNA	241	155.5744934	300.9513464	159.5174393	292.4311148
LINC01666	lincRNA	241	10.37163289	13.39851885	6.135286127	5.429755448
AC008115.2	lincRNA	241	0	1.030655296	0	0
AC246787.4|AC246787.2	lincRNA	241	0.864302741	3.091965887	1.022547688	0
BACH1-AS1	lincRNA	241	3.457210964	10.30655296	3.067643063	6.981114147
AC245748.3	lincRNA	241	0	1.030655296	3.067643063	0.77567935
LINC00529|LINC00529	lincRNA	241	0.864302741	6.183931775	0	0.77567935
AC079949.1	lincRNA	242	0	1.030655296	1.022547688	1.551358699
AC007948.1	lincRNA	242	0	0	0	0.77567935
AC009158.1	lincRNA	242	555.7466625	817.3096496	485.7101517	825.322828
AC005363.2	lincRNA	242	0	0	1.022547688	0
AC195745.1	lincRNA	242	0	0	0	0
GAS5	lincRNA	242	961.104648	550.369928	354.8240477	306.3933431
LINC00921	lincRNA	243	0	3.091965887	1.022547688	0.77567935
AL645939.4	lincRNA	243	0	0	0	0.77567935
AC092807.2	lincRNA	243	0	0	2.045095376	6.205434797
LINC01627	lincRNA	243	6.050119187	34.01162476	4.090190751	20.94334244
LINC01871	lincRNA	243	0.864302741	1.030655296	0	0
AL160162.1	lincRNA	244	0.864302741	1.030655296	0	1.551358699
LINC02674	lincRNA	244	0	0	0	0
AL451081.1	lincRNA	245	0	0	0	0
LINC02054	lincRNA	245	0	0	1.022547688	0
SH3TC2-DT	lincRNA	538	0	6.183931775	3.067643063	5.429755448
AC062004.1	lincRNA	246	884.1817041	1556.289497	829.2861748	1497.836824
LINC02041	lincRNA	246	10.37163289	24.7357271	12.27057225	5.429755448
AC069277.1	lincRNA	246	891.096126	1511.971319	928.4733005	1514.126091
AC093689.1|AC093689.2	lincRNA	824	4.321513705	14.42917414	1.022547688	5.429755448
AC025254.1	lincRNA	247	2158.163944	3956.685681	2335.498919	3962.170118
AC131056.6|AC233699.5|AC243829.5	lincRNA	247	1897.144517	2648.78411	2045.095376	2828.902588
AC112491.1	lincRNA	248	2276.57342	995.6130157	1764.917309	771.0252736
AL161752.1	lincRNA	511	2.592908223	4.122621183	8.180381502	5.429755448
AC008641.1	lincRNA	248	0.864302741	2.061310592	2.045095376	0.77567935
AC092296.3	lincRNA	249	75.19433847	787.420646	57.26267052	78.34361432
AC016553.1	lincRNA	249	0.864302741	0	1.022547688	0
AC012409.4	lincRNA	249	0	0	0	0.77567935
AC104971.3	lincRNA	249	0	0	0	0
AC067747.1	lincRNA	250	1.728605482	2.061310592	2.045095376	3.102717399
AC011474.3	lincRNA	250	0	0	0	0
AC234771.1	lincRNA	250	2.592908223	2.061310592	3.067643063	1.551358699
AL353600.1	lincRNA	251	0.864302741	0	2.045095376	1.551358699
LINC00470	lincRNA	251	0	0	1.022547688	0
AC120045.1|AC139426.2	lincRNA	251	0	1.030655296	0	0
AL138830.2	lincRNA	251	0.864302741	2.061310592	2.045095376	4.654076098
AL122058.1	lincRNA	252	4.321513705	6.183931775	0	0
AC012574.1	lincRNA	252	0.864302741	0	0	0.77567935
AP000146.1	lincRNA	252	4.321513705	18.55179532	5.112738439	17.06494569
AC011131.1	lincRNA	252	1.728605482	16.49048473	5.112738439	11.63519025
AC009276.1	lincRNA	253	50.12955898	47.41014361	76.69107658	58.17595123
AC074131.1	lincRNA	253	764.9079258	1516.09394	723.963763	1324.08465
AC063919.1	lincRNA	254	13.82884386	30.91965887	11.24802457	27.92445659
AC131274.1	lincRNA	254	0	0	0	0.77567935
AC004930.1	lincRNA	254	0	0	1.022547688	0
AC068152.1	lincRNA	509	8.64302741	9.275897662	4.090190751	1.551358699
AC092807.1	lincRNA	255	0	0	3.067643063	2.327038049
AC025271.3	lincRNA	255	0	3.091965887	0	0
AC103879.1	lincRNA	255	0	0	0	0
C1orf195	lincRNA	255	0	0	0	1.551358699
AC012038.2	lincRNA	256	0.864302741	0	0	0.77567935
AL590399.1	lincRNA	256	15.55744934	11.33720825	9.20292919	27.92445659
AL512625.1	lincRNA	256	9.507330152	8.245242366	21.47350144	10.08383155
AL121992.2	lincRNA	256	4.321513705	5.153276479	3.067643063	2.327038049
AC109630.1	lincRNA	256	0	0	0	0
LINC02578	lincRNA	256	0	0	0	0
AC208876.2	lincRNA	256	0.864302741	0	0	0
LINC02522	lincRNA	256	0.864302741	1.030655296	3.067643063	1.551358699
AC116609.2	lincRNA	256	0	1.030655296	0	0
BX005266.2	lincRNA	257	6.050119187	4.122621183	18.40585838	8.532472846
AC060765.1	lincRNA	257	6.050119187	19.58245062	8.180381502	14.73790764
AC108516.1	lincRNA	257	0	0	0	0
LINC01535	lincRNA	257	11.23593563	7.214587071	0	0
LINC02307	lincRNA	257	0.864302741	0	0	0
SNHG5	lincRNA	257	828.0020259	317.4418311	1697.429162	391.7180716
LINC01297	lincRNA	258	0	4.122621183	2.045095376	0
AP002414.5	lincRNA	258	0	0	0	0
AC131956.1	lincRNA	258	0	0	0	0.77567935
LINC00967	lincRNA	530	7.778724669	51.53276479	5.112738439	31.80285334
LINC00613	lincRNA	259	0.864302741	1.030655296	1.022547688	0
AC015936.2	lincRNA	259	0	0	0	0
LINC01688	lincRNA	259	0	1.030655296	1.022547688	0
LINC01699	lincRNA	259	0.864302741	3.091965887	0	0
LINC00616	lincRNA	260	0	0	0	0.77567935
AC009137.1	lincRNA	260	4.321513705	15.45982944	11.24802457	21.71902179
LINC01307	lincRNA	260	0.864302741	1.030655296	0	4.654076098
LINC02532	lincRNA	260	4.321513705	12.36786355	3.067643063	3.102717399
AC068489.1	lincRNA	261	369.9215732	645.1902152	349.7113092	405.6802999
AC016885.2	lincRNA	261	30.25059594	39.16490124	8.180381502	14.73790764
AC239809.3	lincRNA	261	0	1.030655296	0	2.327038049
LINC01344	lincRNA	261	0	2.061310592	0	0
LINC00963	lincRNA	261	28.52199045	15.45982944	19.42840607	6.981114147
AL162713.1	lincRNA	262	0	3.091965887	1.022547688	1.551358699
AC078980.1	lincRNA	262	1.728605482	5.153276479	2.045095376	0.77567935
AC026316.2	lincRNA	263	0	15.45982944	2.045095376	11.63519025
AL023806.2	lincRNA	263	0.864302741	5.153276479	2.045095376	3.102717399
LINC00243	lincRNA	264	3.457210964	1.030655296	1.022547688	0.77567935
AC090181.1	lincRNA	264	0	1.030655296	0	4.654076098
LINC00362	lincRNA	264	0.864302741	9.275897662	0	0.77567935
AC025887.1	lincRNA	264	0	1.030655296	1.022547688	0
AC011897.1	lincRNA	264	0	3.091965887	5.112738439	2.327038049
AL139330.1	lincRNA	264	0	0	0	0.77567935
LINC02234	lincRNA	264	178.9106674	469.9788149	72.60088583	293.9824735
AC124854.1	lincRNA	264	0	2.061310592	0	0
AC004542.1	lincRNA	264	88.15887959	208.1923697	42.94700289	65.93274472
AL157378.1	lincRNA	265	0	0	0	0
AL132709.1	lincRNA	265	0	0	0	0
AC090283.1	lincRNA	265	0	0	0	0
AC006116.9	lincRNA	265	0	0	0	3.102717399
AL354979.1	lincRNA	266	0	0	0	0
AL136309.3	lincRNA	266	0	0	0	0
AP003171.1	lincRNA	266	0	11.33720825	0	5.429755448
AC017091.1	lincRNA	267	210.0255661	386.4957359	242.343802	347.5043487
AC090155.2	lincRNA	267	0	0	0	0
AL359881.1	lincRNA	267	0.864302741	12.36786355	0	0.77567935
C8orf87	lincRNA	267	0	0	0	0.77567935
LINC01515|LINC01515	lincRNA	267	40.62222883	166.9661579	23.51859682	106.2680709
LINC01767	lincRNA	268	0	0	0	0
RMRP|RMRP	lincRNA	268	33162.43187	102769.7315	71909.6436	93968.12346
LINC01786	lincRNA	268	838.3736588	1204.836041	610.4609696	1210.835465
LINC00313|LINC01669	lincRNA	269	0	0	0	0
TTTY19	lincRNA	269	0	0	0	0
LINC01588	lincRNA	269	0	5.153276479	2.045095376	2.327038049
AC073409.1	lincRNA	269	0	1.030655296	1.022547688	0.77567935
AC009108.2	lincRNA	269	5.185816446	8.245242366	0	3.102717399
LINC02220	lincRNA	270	0.864302741	2.061310592	3.067643063	0
AL606490.3	lincRNA	270	643.0412393	1393.44596	517.40913	978.1316599
PCAT19|AC243960.9	lincRNA	270	527.224672	877.0876567	532.7473453	882.7230999
AC011586.2	lincRNA	270	1.728605482	4.122621183	3.067643063	5.429755448
AC023442.2	lincRNA	270	0.864302741	9.275897662	1.022547688	3.102717399
AC104211.4	lincRNA	270	3.457210964	5.153276479	1.022547688	4.654076098
AL391119.1	lincRNA	271	1.728605482	4.122621183	1.022547688	2.327038049
LINC01905	lincRNA	271	9.507330152	26.79703769	28.63133526	20.16766309
AC005899.3	lincRNA	271	255.8336114	534.9100985	243.3663497	414.9884521
AC013417.1	lincRNA	271	0.864302741	1.030655296	0	2.327038049
AC244035.2	lincRNA	271	0	1.030655296	0	0
AC005256.1	lincRNA	272	3.457210964	1.030655296	4.090190751	0.77567935
AC019103.1	lincRNA	272	0	0	0	2.327038049
LINC02164	lincRNA	272	1.728605482	2.061310592	3.067643063	1.551358699
LINC00937	lincRNA	272	1.728605482	3.091965887	2.045095376	1.551358699
AF279873.3	lincRNA	272	0.864302741	19.58245062	1.022547688	10.8595109
AL161716.1	lincRNA	273	38.02932061	21.64376121	46.01464595	19.39198374
LINC02652	lincRNA	273	0	0	0	0
AL512598.1	lincRNA	273	0	1.030655296	2.045095376	2.327038049
AC006482.1	lincRNA	273	0	0	0	1.551358699
LINC01989	lincRNA	273	0	0	0	0
Z83839.2	lincRNA	274	0	3.091965887	1.022547688	6.205434797
AL020994.3	lincRNA	274	9.507330152	34.01162476	5.112738439	6.205434797
AC009065.4	lincRNA	274	114.9522646	162.8435367	98.16457803	145.8277177
AC099520.1	lincRNA	275	0.864302741	4.122621183	2.045095376	0
SNHG9	lincRNA	275	102.8520262	68.02324952	110.4351503	41.11100553
AL352984.1	lincRNA	276	0	0	0	0
AL390957.1	lincRNA	276	0	1.030655296	0	0
LINC00426	lincRNA	276	0	1.030655296	0	0
LINC00648	lincRNA	556	0	3.091965887	2.045095376	3.878396748
LINC01695	lincRNA	276	4.321513705	13.39851885	40.90190751	5.429755448
AL596094.1	lincRNA	276	5.185816446	6.183931775	3.067643063	3.102717399
AC089998.2	lincRNA	277	0	1.030655296	0	1.551358699
LINC02563	lincRNA	277	0	0	0	0
AC008083.2	lincRNA	277	6.050119187	15.45982944	5.112738439	12.41086959
AC004257.1	lincRNA	277	2273.980512	3056.923607	2062.478686	3191.144845
LINC01034	lincRNA	277	0	0	0	0
SNHG25|SNORA50C	lincRNA	278	95.07330152	989.429084	53.17247977	392.4937509
LINC00430	lincRNA	278	0.864302741	7.214587071	0	5.429755448
AC079362.1	lincRNA	278	605.0119187	1565.565394	573.6492528	1290.730438
ERVK13-1	lincRNA	278	5.185816446	18.55179532	7.157833815	20.94334244
AL627309.5	lincRNA	278	3352.630333	5206.870554	3037.98918	5451.474469
LINC01735	lincRNA	279	0	0	0	1.551358699
AC119674.1	lincRNA	569	193.603814	441.1204666	156.4497962	253.6471473
AC141002.1	lincRNA	279	0.864302741	3.091965887	2.045095376	3.102717399
AP001109.1	lincRNA	279	0.864302741	2.061310592	1.022547688	1.551358699
AL357500.1	lincRNA	279	44.07943979	59.77800716	82.82636271	111.6978264
AC092994.1	lincRNA	279	0	1.030655296	0	0
LINC01402	lincRNA	279	0	0	0	0
AP001048.1	lincRNA	280	0	0	0	0
AC011840.3	lincRNA	280	0	0	0	0.77567935
AL109838.1	lincRNA	280	0	1.030655296	0	0.77567935
AL669970.2	lincRNA	280	0	0	0	0.77567935
AC091132.4|AC243807.4	lincRNA	280	2.592908223	12.36786355	6.135286127	10.08383155
AC007368.1	lincRNA	280	0	0	0	0
AL590705.2	lincRNA	281	0	1.030655296	0	1.551358699
LINC01897	lincRNA	281	3.457210964	19.58245062	5.112738439	5.429755448
AL121872.1	lincRNA	281	0	1.030655296	0	0.77567935
AC008014.1	lincRNA	281	23.33617401	21.64376121	9.20292919	12.41086959
AC011257.1	lincRNA	281	0.864302741	0	0	0
AC055878.1	lincRNA	281	0	0	0	0
AL450332.1	lincRNA	281	0.864302741	2.061310592	0	3.102717399
C16orf97	lincRNA	281	0	1.030655296	0	0.77567935
AC009229.3	lincRNA	282	0	5.153276479	0	0
LINC02396	lincRNA	582	0	1.030655296	0	0
LINC00393	lincRNA	282	0	2.061310592	0	0
AL357873.1	lincRNA	282	0	0	0	0
AL136038.2	lincRNA	283	62.22979736	74.2071813	49.08228901	24.82173919
LINC02534	lincRNA	283	0	0	0	0
AC004816.2	lincRNA	284	4.321513705	0	3.067643063	0
AC107463.1	lincRNA	284	1.728605482	2.061310592	1.022547688	2.327038049
AF117829.1	lincRNA	284	1.728605482	12.36786355	2.045095376	6.205434797
AP006621.2	lincRNA	284	0.864302741	23.7050718	0	9.308152196
AC084149.1	lincRNA	284	240.276162	460.7029172	225.983039	446.0156261
AC016168.2	lincRNA	284	2.592908223	4.122621183	1.022547688	2.327038049
AC099793.1	lincRNA	285	19.0146603	15.45982944	5.112738439	7.756793497
AC026785.3	lincRNA	285	0	1.030655296	3.067643063	4.654076098
AL360175.1	lincRNA	285	6.914421928	7.214587071	0	2.327038049
AC091138.1	lincRNA	285	0	0	0	0.77567935
LINC00345	lincRNA	285	4.321513705	0	0	0
AL451129.1	lincRNA	285	3.457210964	0	3.067643063	3.878396748
AP001628.1	lincRNA	285	0	13.39851885	0	8.532472846
LINC02286	lincRNA	285	0	1.030655296	1.022547688	0.77567935
AC078878.2	lincRNA	286	0	0	0	0.77567935
AC026462.2	lincRNA	286	0	0	0	2.327038049
MEG8|MEG8	lincRNA	286	0	0	0	0.77567935
AC084816.1	lincRNA	286	0	0	0	0.77567935
AL359232.1	lincRNA	286	3031.974016	6682.768938	3517.564046	6276.021618
AC025521.1	lincRNA	286	7.778724669	8.245242366	2.045095376	6.205434797
AC000067.1	lincRNA	287	0	2.061310592	1.022547688	0.77567935
AP001434.1	lincRNA	287	2.592908223	7.214587071	9.20292919	6.981114147
AC069114.1	lincRNA	287	0	0	0	1.551358699
AC113346.1	lincRNA	287	0	4.122621183	2.045095376	1.551358699
AL683887.1	lincRNA	287	4.321513705	6.183931775	2.045095376	6.205434797
AC006037.1	lincRNA	287	0	0	0	0
AP001043.2	lincRNA	288	0	0	0	0
CU104787.1	lincRNA	288	9.507330152	14.42917414	1.022547688	0.77567935
AC022655.1	lincRNA	288	0.864302741	3.091965887	0	2.327038049
AC022915.1	lincRNA	289	0	1.030655296	3.067643063	2.327038049
AC114752.1	lincRNA	289	0	0	0	0
AC016747.2	lincRNA	289	0	4.122621183	0	1.551358699
AC005515.2	lincRNA	289	1.728605482	2.061310592	2.045095376	2.327038049
LINC02485	lincRNA	289	957.6474371	2030.390933	873.2557254	1773.978673
AC147067.2	lincRNA	289	0.864302741	0	0	1.551358699
AL035415.1	lincRNA	289	0	0	1.022547688	0
LINC02351	lincRNA	289	0	1.030655296	1.022547688	0.77567935
LINC02614	lincRNA	289	463.2662692	993.5517051	434.5827673	844.7148118
LINC00476	lincRNA	290	5.185816446	20.61310592	19.42840607	10.8595109
LINC00635	lincRNA	290	7.778724669	52.56342009	3.067643063	27.92445659
AC091946.2	lincRNA	291	0.864302741	6.183931775	0	0.77567935
LINC01206	lincRNA	291	0	0	0	0.77567935
LINC01501	lincRNA	291	0	0	1.022547688	0
AP006621.3	lincRNA	291	386.3433252	607.0559692	651.3628771	542.9755448
AP000233.1	lincRNA	291	0	1.030655296	0	0
AC010789.1	lincRNA	291	0	0	0	0.77567935
AC270107.4	lincRNA	291	0	3.091965887	2.045095376	1.551358699
AC009292.2	lincRNA	291	0	7.214587071	0	2.327038049
LINC02615	lincRNA	292	0	3.091965887	0	0.77567935
EPB41L4A-AS1	lincRNA	292	196.1967222	113.3720825	71.57833815	17.84062504
AF064858.2	lincRNA	292	0.864302741	1.030655296	1.022547688	1.551358699
LINC00479	lincRNA	292	0.864302741	0	0	0
AC109492.1	lincRNA	292	91.61609055	394.7409783	53.17247977	251.3201093
LINC00856	lincRNA	292	1.728605482	6.183931775	3.067643063	10.08383155
LINC01583	lincRNA	292	0	0	1.022547688	0.77567935
AL356289.2	lincRNA	292	0	0	0	0
LINC02447	lincRNA	292	0.864302741	1.030655296	1.022547688	0.77567935
AL035252.2	lincRNA	292	0.864302741	0	0	0.77567935
FAM242F	lincRNA	292	4.321513705	1.030655296	3.067643063	1.551358699
AC103724.4	lincRNA	292	0.864302741	1.030655296	1.022547688	0
AC008794.2	lincRNA	293	0	1.030655296	4.090190751	2.327038049
AL390061.1	lincRNA	293	9.507330152	13.39851885	6.135286127	12.41086959
LINC02423	lincRNA	293	0	0	0	0
LINC02004	lincRNA	294	1.728605482	2.061310592	2.045095376	0.77567935
LINC02079	lincRNA	294	3.457210964	7.214587071	4.090190751	2.327038049
IGFL2-AS1	lincRNA	294	6.050119187	12.36786355	6.135286127	6.205434797
AC011676.3	lincRNA	294	0.864302741	5.153276479	0	1.551358699
LINC01483	lincRNA	294	0	0	0	0.77567935
LINC02195	lincRNA	294	0	0	0	0
MIR7515HG	lincRNA	294	2.592908223	1.030655296	2.045095376	5.429755448
AP003174.2	lincRNA	294	0.864302741	1.030655296	0	1.551358699
AC106799.2	lincRNA	295	0	1.030655296	0	0
LINC00644	lincRNA	295	0	0	0	0
LINC00407	lincRNA	295	0	2.061310592	0	0.77567935
LINC01227	lincRNA	295	0	0	2.045095376	0
AC025174.1	lincRNA	295	0	0	1.022547688	0
AL355607.1	lincRNA	295	5.185816446	5.153276479	2.045095376	3.102717399
AL109837.2	lincRNA	295	303.3702621	890.4861756	219.8477529	495.6591044
AC073218.2	lincRNA	295	4194.461202	8629.676792	4390.819771	7670.693089
AC063944.1	lincRNA	295	0	0	0	0
LINC02217	lincRNA	296	0	0	0	0
AP001120.2	lincRNA	296	95.07330152	164.9048473	15.33821532	35.68125008
LINC01814	lincRNA	296	0.864302741	2.061310592	0	0
FRG1-DT|FRG1-DT	lincRNA	297	0	0	1.022547688	1.551358699
LINC02646	lincRNA	297	0	0	0	0
AL451069.2	lincRNA	297	0	0	0	0
AC012170.3	lincRNA	297	31.11489868	58.74735186	4.090190751	18.61630439
AC005899.6	lincRNA	297	680.2062572	1490.327558	593.0776589	1220.143617
AC110792.3	lincRNA	298	76.92294395	184.4872979	55.21757514	120.2302992
LINC01716	lincRNA	298	12.96454112	27.82769299	6.135286127	13.18654894
AC087516.2	lincRNA	298	0.864302741	1.030655296	0	0
AC078851.1	lincRNA	298	0	0	0	0
LINC01680	lincRNA	299	2.592908223	3.091965887	3.067643063	1.551358699
AL139424.2	lincRNA	299	504.7528008	1195.560143	513.3189393	1029.326497
AC026167.1	lincRNA	299	3.457210964	3.091965887	2.045095376	10.08383155
AP007216.2	lincRNA	299	0	3.091965887	0	0
AL392086.1	lincRNA	299	0	5.153276479	2.045095376	4.654076098
LINC00472	lincRNA	300	0	1.030655296	1.022547688	4.654076098
LINC02379	lincRNA	300	0	0	0	0
AC139718.1	lincRNA	300	0	2.061310592	0	0
RASAL2-AS1	lincRNA	300	0	2.061310592	1.022547688	4.654076098
MIR378G	miRNA	41	0	2.061310592	0	1.551358699
MIR4456	miRNA	43	0.864302741	0	0	0
MIR1973	miRNA	44	0	0	0	0.77567935
MIR3713	miRNA	45	0	1.030655296	0	0
MIR4531	miRNA	47	0	0	0	0
MIR4736	miRNA	47	0	0	0	0
MIR1469	miRNA	47	2.592908223	3.091965887	0	2.327038049
MIR320D1	miRNA	48	0	0	0	0.77567935
MIR320D2	miRNA	48	0	0	0	0
MIR4430	miRNA	49	1.728605482	12.36786355	8.180381502	4.654076098
MIR7977	miRNA	49	3.457210964	3.091965887	4.090190751	3.878396748
AL928646.1	miRNA	49	6.914421928	7.214587071	10.22547688	0
MIR2054	miRNA	49	0.864302741	0	0	0
MIR1268B	miRNA	50	3352.630333	2976.532494	3767.065682	595.7217405
MIR320C2	miRNA	50	0	0	0	0
MIR1539	miRNA	50	0	0	0	0
AL162291.1	miRNA	51	0	0	0	0
MIR302F	miRNA	51	2.592908223	10.30655296	1.022547688	5.429755448
MIR4718	miRNA	51	0	0	0	0.77567935
MIR6088	miRNA	51	0	0	0	0
MIR1268A	miRNA	52	26.79338497	30.91965887	9.20292919	30.25149464
MIR7160	miRNA	52	0.864302741	0	0	0
MIR3201	miRNA	52	0	0	0	0
MIR4507	miRNA	52	1.728605482	1.030655296	1.022547688	0.77567935
MIR1976|MIR1976	miRNA	52	0	1.030655296	1.022547688	0.77567935
MIR1587	miRNA	53	0	0	2.045095376	0
MIR4443	miRNA	53	4.321513705	7.214587071	3.067643063	6.981114147
MIR924	miRNA	53	0	3.091965887	0	0.77567935
MIR1825	miRNA	53	2.592908223	5.153276479	7.157833815	17.84062504
AC007182.3	miRNA	53	17373.3494	10935.25269	7085.232929	5824.576237
MIR5587	miRNA	53	0	0	0	0
MIR320E	miRNA	53	0	0	0	0
MIR4657	miRNA	53	24.20047675	8.245242366	9.20292919	5.429755448
MIR4434	miRNA	53	0	4.122621183	0	3.102717399
MIR4466	miRNA	54	2.592908223	5.153276479	2.045095376	0.77567935
MIR6510	miRNA	54	0	0	0	0
MIR378D1	miRNA	54	0	1.030655296	1.022547688	0
MIR548AU	miRNA	54	0	0	0	0
MIR4520-2	miRNA	54	0	0	0	0
MIR7152	miRNA	54	1.728605482	7.214587071	0	0
MIR4634	miRNA	54	0	6.183931775	1.022547688	1.551358699
MIR4747	miRNA	54	0	0	0	0
MIR4262	miRNA	54	0	2.061310592	0	0
MIR1281	miRNA	54	0.864302741	0	1.022547688	3.102717399
MIR5590	miRNA	54	0	1.030655296	0	1.551358699
MIR4727	miRNA	55	0	0	0	0
MIR4266	miRNA	55	0	0	0	0.77567935
MIR4454	miRNA	55	0.864302741	20.61310592	13.29311994	14.73790764
MIR6086	miRNA	55	0.864302741	3.091965887	0	1.551358699
MIR4540	miRNA	55	0.864302741	0	0	0
MIR5787	miRNA	55	0	0	2.045095376	0
MIR2052	miRNA	55	2.592908223	2.061310592	2.045095376	5.429755448
MIR3193	miRNA	55	1.728605482	1.030655296	0	0
MIR3929	miRNA	55	172.8605482	383.40377	138.0439379	357.5881802
MIR4710	miRNA	56	0.864302741	0	0	0
MIR4530	miRNA	56	0	3.091965887	0	0
MIR6813	miRNA	56	0	0	0	0
MIR7856	miRNA	56	0	3.091965887	1.022547688	1.551358699
MIR3654	miRNA	56	886.7746123	432.8752242	451.966078	338.1961965
MIR548BA	miRNA	56	0.864302741	1.030655296	0	0
MIR4750	miRNA	56	0	1.030655296	0	0
MIR3658	miRNA	56	7.778724669	8.245242366	18.40585838	14.73790764
MIR6871	miRNA	56	0	1.030655296	0	0.77567935
MIR921	miRNA	56	0	0	0	0.77567935
MIR3155B	miRNA	56	0	2.061310592	0	0.77567935
MIR5703	miRNA	56	0	0	0	0
MIR4328	miRNA	56	0	0	0	0
MIR7155	miRNA	56	0	1.030655296	0	0
MIR6838	miRNA	56	0	2.061310592	5.112738439	2.327038049
MIR378B	miRNA	57	0	0	0	0
MIR7153	miRNA	57	0	0	0	0
MIR7705	miRNA	57	12.96454112	11.33720825	16.360763	3.878396748
MIR6515	miRNA	57	0	12.36786355	0	0
MIR1471	miRNA	57	0	0	0	0
MIR4514	miRNA	57	1.728605482	6.183931775	0	0.77567935
MIR4310	miRNA	57	9.507330152	10.30655296	8.180381502	10.8595109
MIR6894	miRNA	57	2.592908223	0	1.022547688	7.756793497
MIR4485	miRNA	57	6.914421928	7.214587071	5.112738439	0
MIR548AK	miRNA	57	0	0	0	0
MIR548AR	miRNA	57	0.864302741	3.091965887	0	0.77567935
MIR548AT	miRNA	58	0	4.122621183	2.045095376	1.551358699
MIR4462	miRNA	58	0	2.061310592	2.045095376	0
MIR4726	miRNA	58	0	0	0	0
MIR3928	miRNA	58	0.864302741	2.061310592	0	0
MIR4519	miRNA	58	0	1.030655296	0	0.77567935
MIR4279	miRNA	58	0	0	0	0.77567935
MIR4770	miRNA	58	0	1.030655296	0	0.77567935
MIR6811	miRNA	58	0	0	0	0.77567935
MIR548AQ	miRNA	58	10.37163289	4.122621183	5.112738439	10.08383155
MIR6868	miRNA	58	1.728605482	0	0	0
MIR5579	miRNA	58	0	0	0	0
MIR4455	miRNA	58	0	0	0	0
MIR4261	miRNA	58	2.592908223	3.091965887	1.022547688	0.77567935
MIR5580	miRNA	58	0	1.030655296	1.022547688	3.878396748
MIR548AS	miRNA	58	1.728605482	5.153276479	2.045095376	0
MIR5585	miRNA	59	28.52199045	60.80866245	17.38331069	40.33532618
MIR6889	miRNA	59	0	0	0	0
MIR761	miRNA	59	0	4.122621183	0	0
MIR7978	miRNA	59	6.050119187	9.275897662	7.157833815	5.429755448
MIR7702	miRNA	59	0	0	0	0
MIR7113	miRNA	59	0	0	0	3.102717399
MIR4673	miRNA	59	0	2.061310592	3.067643063	3.102717399
MIR4535	miRNA	59	0	0	0	0
MIR1206	miRNA	59	0	4.122621183	0	0.77567935
MIR6776	miRNA	59	0	0	0	0
MIR4326	miRNA	59	0	0	0	0.77567935
MIR5583-1	miRNA	59	0	1.030655296	0	0.77567935
MIR6827	miRNA	59	0	0	6.135286127	0.77567935
MIR5583-2	miRNA	59	0	0	0	0
MIR6736	miRNA	59	0	0	0	0
MIR6808	miRNA	59	0	1.030655296	1.022547688	0
MIR7704	miRNA	59	0	0	1.022547688	0
MIR5586	miRNA	59	0	2.061310592	0	0.77567935
MIR4690	miRNA	60	0	1.030655296	2.045095376	4.654076098
MIR4302	miRNA	60	0	0	0	0
MIR6870	miRNA	60	0	1.030655296	0	1.551358699
MIR6846	miRNA	60	0.864302741	0	0	0
MIR6508	miRNA	60	0	1.030655296	0	0
MIR5581	miRNA	60	0	0	0	1.551358699
MIR7151	miRNA	60	0.864302741	1.030655296	1.022547688	0
MIR3650	miRNA	60	1.728605482	1.030655296	1.022547688	1.551358699
MIR5681B	miRNA	60	0	0	0	0
MIR4534	miRNA	60	6.050119187	1.030655296	1.022547688	3.878396748
MIR3677	miRNA	60	3.457210964	3.091965887	3.067643063	1.551358699
MIR5589	miRNA	60	0.864302741	2.061310592	0	0
MIR6771	miRNA	60	0	0	0	0
MIR6828	miRNA	60	0	0	0	0
MIR6732	miRNA	60	0	2.061310592	0	1.551358699
MIR5584	miRNA	60	0	0	1.022547688	0
MIR1295B	miRNA	60	0	0	0	0
MIR548H5	miRNA	60	0.864302741	1.030655296	0	3.102717399
MIR7157	miRNA	60	0	1.030655296	1.022547688	0.77567935
MIR6090	miRNA	60	0	0	0	0
MIR4481	miRNA	60	0	0	0	0
MIR4539	miRNA	60	0	0	0	0
MIR4437	miRNA	60	0	1.030655296	1.022547688	0.77567935
MIR4521	miRNA	60	12.10023837	0	41.9244552	3.878396748
MIR6068	miRNA	60	0	0	0	0
MIR4722	miRNA	60	0	5.153276479	0	1.551358699
MIR6770-3|MIR6770-1|MIR6770-2	miRNA	60	0	0	1.022547688	0
MIR7156	miRNA	60	0	7.214587071	0	2.327038049
MIR6504	miRNA	61	0	0	0	0
MIR6886	miRNA	61	0.864302741	1.030655296	0	1.551358699
MIR6833	miRNA	61	0	0	0	0
MIR6823	miRNA	61	0	0	0	0
MIR6747	miRNA	61	0	0	0	0
MIR7855	miRNA	61	0	0	0	0
MIR1537	miRNA	61	0	0	0	1.551358699
MIR4251	miRNA	61	3.457210964	13.39851885	15.33821532	10.8595109
MIR6819	miRNA	61	0	3.091965887	0	0
MIR6726	miRNA	61	0	0	0	0
AP003304.1	miRNA	61	12.96454112	7.214587071	4.090190751	6.205434797
MIR7114	miRNA	61	0	0	0	0
MIR6822	miRNA	61	0	0	0	0.77567935
MIR6845	miRNA	61	0	1.030655296	0	0.77567935
MIR4749	miRNA	61	0	0	0	0
MIR3141	miRNA	61	0	0	0	1.551358699
MIR6733	miRNA	61	0	0	0	0
MIR520B	miRNA	61	0	0	0	0
MIR4496	miRNA	61	0.864302741	0	0	0.77567935
MIR4632	miRNA	61	0	0	0	0
MIR6764	miRNA	61	0	2.061310592	1.022547688	0.77567935
MIR6850	miRNA	61	1.728605482	2.061310592	7.157833815	0.77567935
MIR380	miRNA	61	0	0	0	0.77567935
MIR1470	miRNA	61	0	0	0	0
MIR6815	miRNA	61	0	0	0	0
MIR4475	miRNA	61	0	6.183931775	0	0
MIR1538	miRNA	61	0	0	0	0
MIR6890	miRNA	61	0	0	0	0
MIR3687-2|FP671120.1	miRNA	61	8.64302741	130.8932226	2.045095376	18.61630439
MIR6787	miRNA	61	0.864302741	0	1.022547688	0
MIR4489	miRNA	62	0	2.061310592	0	2.327038049
MIR4281	miRNA	62	0	2.061310592	0	1.551358699
MIR4304	miRNA	62	0.864302741	0	0	0
MIR1279	miRNA	62	1.728605482	17.52114003	1.022547688	3.878396748
MIR6872	miRNA	62	0	1.030655296	0	0
MIR103B1	miRNA	62	0	0	0	0
MIR6796	miRNA	62	0	0	0	0
MIR6769B	miRNA	62	0	0	0	0
MIR6844	miRNA	62	0	0	0	0
MIR6805	miRNA	62	0.864302741	0	2.045095376	0.77567935
MIR6742	miRNA	62	0.864302741	4.122621183	4.090190751	0
MIR4418	miRNA	62	0	0	0	0
MIR4745	miRNA	62	0.864302741	5.153276479	0	0
MIR6820	miRNA	62	3.457210964	2.061310592	1.022547688	2.327038049
MIR103B2	miRNA	62	0	0	0	0.77567935
MIR3685	miRNA	62	2.592908223	3.091965887	6.135286127	10.08383155
MIR6880	miRNA	62	0.864302741	1.030655296	0	0
MIR6079	miRNA	62	0	0	0	0
MIR6499	miRNA	62	0	0	0	0
MIR198	miRNA	62	0	0	5.112738439	20.16766309
MIR6869	miRNA	62	0	0	2.045095376	1.551358699
MIR4669	miRNA	62	11.23593563	20.61310592	0	1.551358699
MIR4483	miRNA	62	0	0	0	0.77567935
MIR4488	miRNA	62	0	0	1.022547688	0
MIR548AV	miRNA	62	0.864302741	9.275897662	0	1.551358699
MIR6756	miRNA	63	0	0	0	0
MIR3182	miRNA	63	0	0	0	0
MIR1255B1	miRNA	63	0	6.183931775	5.112738439	4.654076098
MIR3131	miRNA	63	0	0	0	0.77567935
MIR4486	miRNA	63	0	0	0	0
MIR4646	miRNA	63	1.728605482	0	0	0
AL606469.2	miRNA	63	0.864302741	13.39851885	2.045095376	3.878396748
MIR4692	miRNA	63	1.728605482	0	0	0
MIR6751	miRNA	63	0	0	0	2.327038049
MIR4252	miRNA	63	1.728605482	4.122621183	0	2.327038049
MIR6836	miRNA	63	0	0	0	0
MIR4467	miRNA	63	0	3.091965887	0	0
MIR4740	miRNA	63	1.728605482	2.061310592	1.022547688	1.551358699
MIR4701	miRNA	63	0.864302741	0	0	0
MIR6873	miRNA	63	0	5.153276479	1.022547688	0.77567935
MIR6790	miRNA	63	0	2.061310592	0	0
MIR6758	miRNA	63	0	3.091965887	1.022547688	1.551358699
MIR3606	miRNA	63	0	0	0	0
MIR6746	miRNA	63	0	0	0	1.551358699
MIR6793	miRNA	63	0	2.061310592	0	0
MIR6741	miRNA	63	0	0	0	0
MIR4426	miRNA	63	1010.369904	481.3160231	568.5365144	293.9824735
MIR6824	miRNA	63	0	0	0	3.878396748
MIR3143	miRNA	63	0	1.030655296	0	0
MIR299	miRNA	63	0	4.122621183	0	0.77567935
MIR5588	miRNA	63	259.2908223	512.235682	319.0348786	446.7913054
MIR1205	miRNA	63	1.728605482	0	1.022547688	4.654076098
MIR3926-2|MIR3926-2	miRNA	63	0	2.061310592	0	0
MIR6806	miRNA	64	0	0	0	0
MIR6837	miRNA	64	0	0	0	0
MIR6861	miRNA	64	0	0	0	0
MIR486-2	miRNA	64	0	1.030655296	0	0
MIR6812	miRNA	64	0	0	0	0
MIR6089	miRNA	64	0	0	0	0
MIR29A	miRNA	64	0	0	0	1.551358699
MIR4268	miRNA	64	0	1.030655296	0	1.551358699
MIR6835	miRNA	64	0	0	0	0
MIR6513	miRNA	64	0.864302741	1.030655296	0	0
MIR6772	miRNA	64	1.728605482	0	0	1.551358699
MIR4256	miRNA	64	0	1.030655296	0	0
MIR6783	miRNA	64	0	0	1.022547688	0.77567935
MIR6738	miRNA	64	0	0	0	1.551358699
MIR548AG2	miRNA	64	0	0	0	0
MIR6779	miRNA	64	0	1.030655296	0	0
MIR4272	miRNA	64	0	0	0	0.77567935
MIR6781	miRNA	64	0	0	0	0.77567935
MIR4468	miRNA	64	18.15035756	59.77800716	22.49604913	36.45692943
MIR375	miRNA	64	0	0	0	0
MIR4649	miRNA	64	0	0	0	0
MIR4501	miRNA	64	0	0	0	0
MIR3196	miRNA	64	0	0	0	0
MIR6877	miRNA	64	1.728605482	0	0	0
MIR1252	miRNA	65	149.5243742	230.8667863	97.14203034	126.435734
MIR7109	miRNA	65	0.864302741	0	1.022547688	1.551358699
MIR6759	miRNA	65	0	3.091965887	0	0
MIR6842	miRNA	65	0	1.030655296	0	0.77567935
MIR8085	miRNA	65	0	0	0	0
MIR6803	miRNA	65	0	1.030655296	0	0
MIR6727	miRNA	65	0	0	0	0
MIR7106	miRNA	65	0	0	0	0
MIR7854	miRNA	65	1.728605482	2.061310592	0	1.551358699
MIR5684	miRNA	65	1.728605482	7.214587071	9.20292919	17.84062504
MIR6865	miRNA	65	0	0	0	3.102717399
MIR6818	miRNA	65	0	0	0	0
MIR6802	miRNA	65	0	0	0	1.551358699
MIR155	miRNA	65	0	2.061310592	0	2.327038049
MIR548AW	miRNA	65	0	0	0	0
MIR4658	miRNA	65	8.64302741	4.122621183	3.067643063	3.878396748
MIR4317	miRNA	65	0	0	0	0
MIR362	miRNA	65	0	0	0	0
MIR6887	miRNA	65	0	1.030655296	0	0
MIR5591	miRNA	65	0	2.061310592	0	2.327038049
MIR7112	miRNA	65	0.864302741	0	0	0
MIR9500	miRNA	65	2.592908223	6.183931775	0	7.756793497
MIR4320	miRNA	65	0.864302741	1.030655296	3.067643063	3.102717399
MIR4291	miRNA	65	0	0	0	0
MIR6763	miRNA	65	0	0	0	0
MIR3670-1|MIR3670-2|MIR3670-3|MIR3670-4	miRNA	65	3.457210964	2.061310592	1.022547688	1.551358699
MIR526A2	miRNA	65	0	0	0	0
MIR8071-2|MIR8071-1	miRNA	65	0	0	0	0
MIR4450	miRNA	65	0	0	0	0
MIR6729	miRNA	65	0	0	1.022547688	2.327038049
MIR3714|MIR3714	miRNA	65	6.914421928	22.67441651	9.20292919	14.73790764
MIR6860	miRNA	66	0.864302741	4.122621183	1.022547688	0.77567935
MIR6755	miRNA	66	0	0	0	3.878396748
MIR378A	miRNA	66	0	1.030655296	0	0
MIR7976	miRNA	66	0	0	0	0.77567935
MIR6767	miRNA	66	1.728605482	0	0	0
MIR3064	miRNA	66	7.778724669	88.63635544	1.022547688	21.71902179
MIR6080	miRNA	66	6.914421928	5.153276479	1.022547688	5.429755448
MIR548BB	miRNA	66	0	0	0	0
MIR6506	miRNA	66	4.321513705	3.091965887	0	1.551358699
MIR6777	miRNA	66	3.457210964	4.122621183	6.135286127	3.102717399
MIR3689F	miRNA	66	0	0	0	1.551358699
MIR4667	miRNA	66	0	0	0	0
MIR6885	miRNA	66	0	0	0	0
MIR6852	miRNA	66	0	1.030655296	0	0
MIR668	miRNA	66	0	1.030655296	0	0.77567935
MIR1827	miRNA	66	0	1.030655296	0	1.551358699
MIR1292	miRNA	66	6.050119187	2.061310592	0	5.429755448
MIR4264	miRNA	66	0	0	0	0
MIR6816	miRNA	66	0	1.030655296	0	0
MIR6878	miRNA	66	0	0	3.067643063	0.77567935
MIR6882	miRNA	66	0	0	0	0
MIR371B	miRNA	66	0.864302741	1.030655296	0	0
MIR376C	miRNA	66	0	0	0	0
MIR6825	miRNA	66	0	1.030655296	0	0.77567935
MIR4680	miRNA	66	6.050119187	6.183931775	2.045095376	2.327038049
MIR7159	miRNA	66	0	1.030655296	0	0
MIR4641	miRNA	66	0	0	0	1.551358699
MIR4495	miRNA	66	0	5.153276479	2.045095376	2.327038049
MIR548AG1	miRNA	66	0	1.030655296	0	3.102717399
MIR4301	miRNA	66	0	0	0	0
MIR6744	miRNA	66	0	0	0	0.77567935
MIR4303	miRNA	66	63.0941001	44.31817772	19.42840607	19.39198374
MIR4449	miRNA	66	1.728605482	7.214587071	0	7.756793497
AC016601.1	miRNA	66	496.9740761	1180.100314	623.7540896	1034.756252
MIR3147	miRNA	66	0.864302741	0	0	0
MIR6879	miRNA	66	0	1.030655296	0	0
MIR4451	miRNA	66	0	1.030655296	0	0
MIR297	miRNA	66	0.864302741	1.030655296	0	0
MIR3128	miRNA	66	0	1.030655296	0	0
MIR6788	miRNA	66	0	0	0	0
MIR1249	miRNA	66	0	2.061310592	1.022547688	0
MIR6754	miRNA	66	0	1.030655296	1.022547688	0
MIR4498	miRNA	66	0	2.061310592	0	0.77567935
MIR6817	miRNA	66	1.728605482	1.030655296	0	0
MIR3649|MIR3649	miRNA	66	0	2.061310592	1.022547688	1.551358699
MIR1255B2	miRNA	67	5.185816446	23.7050718	3.067643063	9.308152196
MIR4260	miRNA	67	0.864302741	0	0	0.77567935
MIR611	miRNA	67	0	0	0	0.77567935
MIR6792	miRNA	67	0.864302741	0	0	0
MIR6798	miRNA	67	0	1.030655296	0	0.77567935
MIR371A	miRNA	67	0	1.030655296	4.090190751	2.327038049
MIR6858	miRNA	67	0	0	0	0
MIR6856	miRNA	67	0	2.061310592	0	2.327038049
MIR7515	miRNA	67	0	0	0	0
MIR4472-2	miRNA	67	50.12955898	99.97356369	31.69897832	90.75448391
MIR6888	miRNA	67	0	0	0	0
MIR6867	miRNA	67	0	1.030655296	0	0
MIR379	miRNA	67	0	6.183931775	0	3.878396748
MIR6501	miRNA	67	18.15035756	40.19555654	16.360763	30.25149464
MIR4463	miRNA	67	0	6.183931775	0	0
MIR4288	miRNA	67	0	2.061310592	1.022547688	2.327038049
MIR4282	miRNA	67	0	0	0	0
MIR338	miRNA	67	0	1.030655296	0	2.327038049
MIR1204	miRNA	67	2.592908223	9.275897662	3.067643063	2.327038049
MIR6855	miRNA	67	0	0	0	0
MIR4442	miRNA	67	0.864302741	2.061310592	2.045095376	0.77567935
MIR6829	miRNA	67	0	0	0	0
MIR4662A	miRNA	67	1.728605482	5.153276479	1.022547688	0
MIR372	miRNA	67	0	0	0	0
MIR548AE2	miRNA	67	0.864302741	6.183931775	1.022547688	3.102717399
MIR3124	miRNA	67	0	0	0	3.102717399
MIR4271	miRNA	67	0	0	1.022547688	3.102717399
MIR6784	miRNA	67	0.864302741	2.061310592	1.022547688	0.77567935
MIR4728	miRNA	67	0	0	2.045095376	0
MIR6730	miRNA	67	0	0	1.022547688	0.77567935
MIR6511A2|MIR6511A4|MIR6511A1|MIR6511A3	miRNA	67	0	0	0	0
MIR4446	miRNA	67	0	0	0	0
MIR4292	miRNA	67	0	2.061310592	1.022547688	2.327038049
MIR6791	miRNA	67	0.864302741	0	0	0.77567935
MIR517B	miRNA	67	0	0	0	0
MIR7706	miRNA	67	0	0	0	0.77567935
MIR6851	miRNA	67	0	0	0	0
MIR4708	miRNA	67	0	0	0	0
MIR676	miRNA	67	0	0	0	0
MIR302C	miRNA	68	0	1.030655296	0	0.77567935
MIR148A	miRNA	68	7.778724669	23.7050718	3.067643063	18.61630439
MIR5582	miRNA	68	0	0	0	0
MIR4491	miRNA	68	0	0	0	0.77567935
AC061709.1	miRNA	68	15.55744934	15.45982944	3.067643063	15.51358699
MIR302D	miRNA	68	0	1.030655296	1.022547688	0
MIR6804	miRNA	68	0.864302741	1.030655296	0	0
MIR4638	miRNA	68	0	0	0	0
MIR451B	miRNA	68	0	0	0	0
MIR7975	miRNA	68	0	2.061310592	2.045095376	2.327038049
MIR139	miRNA	68	0.864302741	3.091965887	0	2.327038049
MIR4427	miRNA	68	0	1.030655296	0	2.327038049
MIR5691	miRNA	68	2.592908223	4.122621183	1.022547688	3.102717399
MIR3679	miRNA	68	0	2.061310592	0	0
MIR4510	miRNA	68	0	0	0	0
MIR6795	miRNA	68	0	2.061310592	0	0
MIR6760	miRNA	68	0	0	0	0
MIR3115	miRNA	68	0	1.030655296	0	0
MIR553	miRNA	68	0	1.030655296	0	1.551358699
MIR6794	miRNA	68	0	0	0	0
MIR3135B	miRNA	68	26.79338497	81.42176837	39.87935982	52.74619578
MIR4253	miRNA	68	2.592908223	3.091965887	5.112738439	10.08383155
MIR6734	miRNA	68	0.864302741	0	0	0
MIR3674	miRNA	68	0	2.061310592	1.022547688	2.327038049
MIR3116-2	miRNA	68	0.864302741	0	0	1.551358699
MIR200C	miRNA	68	0	0	0	0
MIR376A1	miRNA	68	6.914421928	0	3.067643063	0.77567935
MIR486-1	miRNA	68	0	1.030655296	2.045095376	0
MIR24-1	miRNA	68	0	0	1.022547688	0
MIR367	miRNA	68	0	3.091965887	0	0.77567935
MIR4457	miRNA	68	0	0	0	0
MIR6780A	miRNA	68	1.728605482	0	0	0
MIR3173	miRNA	68	0	0	0	0
MIR8068	miRNA	68	0	0	0	0
MIR3185	miRNA	68	3.457210964	12.36786355	8.180381502	13.18654894
MIR6859-2|MIR6859-4|MIR6859-1|MIR6859-3	miRNA	68	0	11.33720825	2.045095376	3.878396748
MIR377	miRNA	69	0	2.061310592	0	0
MIR373	miRNA	69	0	0	0	0
MIR20B	miRNA	69	0	2.061310592	0	0
MIR6866	miRNA	69	4.321513705	0	3.067643063	4.654076098
MIR1264	miRNA	69	0	1.030655296	0	0
MIR4499	miRNA	69	0	3.091965887	1.022547688	0
MIR1180	miRNA	69	0	0	0	0
MIR4323	miRNA	69	0.864302741	0	0	0
MIR6854	miRNA	69	0	1.030655296	0	0
MIR4639	miRNA	69	0	5.153276479	0	0.77567935
MIR4523	miRNA	69	3.457210964	4.122621183	0	0
MIR6893	miRNA	69	0	3.091965887	0	0
MIR6847	miRNA	69	0	1.030655296	0	2.327038049
MIR302A	miRNA	69	0	0	0	0
MIR6782	miRNA	69	0	0	3.067643063	0
MIR33A	miRNA	69	0	0	0	0.77567935
MIR4685	miRNA	69	0	0	0	0.77567935
MIR8057	miRNA	69	3.457210964	4.122621183	5.112738439	4.654076098
MIR4278	miRNA	69	0	4.122621183	1.022547688	1.551358699
MIR2909	miRNA	69	0.864302741	1.030655296	0	0.77567935
MIR6799	miRNA	69	3.457210964	2.061310592	0	1.551358699
MIR6749	miRNA	69	0	0	0	0
MIR8052	miRNA	69	0	0	0	0
MIR7162	miRNA	69	0	0	0	3.102717399
MIR1245B	miRNA	69	0	1.030655296	0	0
MIR3692	miRNA	69	0	0	0	0
MIR4735	miRNA	69	0	0	1.022547688	0.77567935
MIR4524A	miRNA	69	0.864302741	0	1.022547688	0.77567935
MIR4421	miRNA	69	0	0	0	0
MIR5692A1|MIR5692A2|MIR5692A2	miRNA	69	0	7.214587071	1.022547688	1.551358699
MIR6757	miRNA	69	0	0	0	0
MIR6775	miRNA	69	1.728605482	1.030655296	0	0
AP003392.14|AP003392.13	miRNA	69	12.96454112	10.30655296	22.49604913	7.756793497
MIR4743|MIR4743	miRNA	69	0	1.030655296	0	0.77567935
MIR1229|MIR1229	miRNA	69	3.457210964	2.061310592	0	0
MIR6849|MIR6849	miRNA	69	0.864302741	0	1.022547688	1.551358699
AC098818.3	miRNA	70	1222.988379	1959.275717	1403.957975	2190.518483
MIR1251	miRNA	70	0	0	0	0
MIR4696	miRNA	70	0	4.122621183	0	0.77567935
MIR6507	miRNA	70	0	1.030655296	0	0
MIR4465	miRNA	70	0	0	0	0
MIR374C	miRNA	70	0	4.122621183	0	0
MIR6774	miRNA	70	0	1.030655296	0	0
MIR6862-1|MIR6862-2	miRNA	70	0.864302741	0	0	0
MIR4537	miRNA	70	0	0	0	0
MIR4711	miRNA	70	0	0	0	0
MIR6864	miRNA	70	0	1.030655296	0	0
MIR718	miRNA	70	0	0	0	0
MIR4276	miRNA	70	0	0	0	0
MIR548O2	miRNA	70	2.592908223	6.183931775	0	0.77567935
MIR4734	miRNA	70	0	0	0	0
MIR1245A	miRNA	70	10.37163289	2.061310592	9.20292919	7.756793497
MIR3975	miRNA	70	0	1.030655296	0	0
MIR4527	miRNA	70	0	0	1.022547688	0
MIR6810	miRNA	70	0	0	0	0
MIR4668	miRNA	70	6.050119187	10.30655296	6.135286127	10.08383155
MIR4689	miRNA	70	0	0	0	0
MIR6737	miRNA	70	0	0	0	0
MIR4270	miRNA	70	0	1.030655296	0	0
MIR6830	miRNA	70	0	0	0	0
MIR3977	miRNA	70	0	1.030655296	0	0
MIR30D	miRNA	70	0	1.030655296	0	0
MIR4476	miRNA	70	2.592908223	0	3.067643063	1.551358699
MIR4445	miRNA	70	0	0	0	0
MIR32	miRNA	70	0	2.061310592	0	0.77567935
MIR369	miRNA	70	0	0	0	0
MIR99B	miRNA	70	0	2.061310592	0	0
MIR4520-1	miRNA	70	1.728605482	3.091965887	2.045095376	2.327038049
MIR3187	miRNA	70	0	1.030655296	0	0
MIR4482	miRNA	70	0	4.122621183	2.045095376	1.551358699
MIR4508	miRNA	70	0	0	0	0
MIR196A1	miRNA	70	0.864302741	0	0	0
MIR6514	miRNA	70	0	1.030655296	0	0.77567935
MIR4731	miRNA	70	0	1.030655296	0	0.77567935
MIR548AE1	miRNA	70	0	3.091965887	0	0.77567935
MIR6814	miRNA	70	0	0	0	0
MIR4289	miRNA	70	0	0	0	0
MIR6848|MIR6848	miRNA	70	1.728605482	0	0	0
MIR4316	miRNA	71	0	0	0	0
MIR3927	miRNA	71	0	0	0	0
MIR1-1	miRNA	71	0	0	0	0
MIR31	miRNA	71	1.728605482	1.030655296	0	0
MIR30A	miRNA	71	0	0	0	0
MIR4452	miRNA	71	1.728605482	0	0	0.77567935
MIR4746	miRNA	71	0	1.030655296	0	1.551358699
MIR6840	miRNA	71	0	1.030655296	1.022547688	0.77567935
MIR4664	miRNA	71	6.914421928	9.275897662	0	0.77567935
MIR6072	miRNA	71	0	0	0	0
MIR5700	miRNA	71	2.592908223	11.33720825	9.20292919	10.08383155
MIR6748	miRNA	71	1.728605482	3.091965887	0	0.77567935
MIR6505	miRNA	71	0	0	4.090190751	1.551358699
MIR4479	miRNA	71	8.64302741	9.275897662	3.067643063	4.654076098
MIR4329	miRNA	71	0	0	0	0
MIR18B	miRNA	71	0	1.030655296	0	0
MIR4533	miRNA	71	5.185816446	3.091965887	2.045095376	10.08383155
MIR4797	miRNA	71	0	0	0	0
MIR18A	miRNA	71	0	0	0	0.77567935
MIR20A	miRNA	71	0	0	0	0.77567935
MIR208A	miRNA	71	0	0	0	0
MIR503	miRNA	71	0	4.122621183	0	0
MIR6752	miRNA	71	0	1.030655296	0	1.551358699
MIR199A1	miRNA	71	0.864302741	0	0	1.551358699
MIR4480	miRNA	71	0	3.091965887	0	0
MIR6874	miRNA	71	1.728605482	2.061310592	0	0.77567935
MIR6743	miRNA	71	0	1.030655296	2.045095376	0
MIR4758	miRNA	71	2.592908223	1.030655296	0	1.551358699
MIR7158	miRNA	71	0.864302741	0	0	0
MIR1293	miRNA	71	0	0	0	1.551358699
MIR4705	miRNA	71	0.864302741	6.183931775	0	0
MIR1322|MIR1322	miRNA	71	0	0	0	0
MIR6832	miRNA	72	0	4.122621183	0	1.551358699
MIR3689C	miRNA	72	0	2.061310592	0	0
MIR8073	miRNA	72	0	2.061310592	0	0.77567935
MIR4681	miRNA	72	0	1.030655296	0	0
MIR4752	miRNA	72	0.864302741	0	0	0.77567935
MIR147A	miRNA	72	0	1.030655296	0	0.77567935
MIR21	miRNA	72	0.864302741	57.71669656	0	2.327038049
MIR6797	miRNA	72	4.321513705	3.091965887	4.090190751	8.532472846
MIR4299	miRNA	72	47.53665076	49.4714542	17.38331069	14.73790764
MIR4470	miRNA	72	0	0	0	0
MIR4755	miRNA	72	0	0	0	0
MIR4676	miRNA	72	0.864302741	1.030655296	0	0.77567935
MIR374A	miRNA	72	0	0	0	0
MIRLET7A2	miRNA	72	0	0	2.045095376	3.102717399
MIR6841	miRNA	72	3.457210964	2.061310592	0	2.327038049
MIR4729	miRNA	72	0	3.091965887	0	0
MIR5698	miRNA	72	0	0	0	0
MIR30C2	miRNA	72	0	6.183931775	3.067643063	4.654076098
MIR3689E	miRNA	72	0.864302741	0	0	0.77567935
MIR665	miRNA	72	0	0	0	0
MIR1302-7	miRNA	72	0	0	0	0.77567935
MIR361	miRNA	72	0	0	0	1.551358699
MIR374B	miRNA	72	0	2.061310592	0	0
MIR3681	miRNA	72	0	0	0	0
MIR6766	miRNA	72	0	2.061310592	1.022547688	0.77567935
MIR7111	miRNA	72	1.728605482	4.122621183	1.022547688	11.63519025
MIR6731	miRNA	72	0	0	0	0
MIR4324	miRNA	72	0.864302741	2.061310592	0	0
MIR6761	miRNA	72	0	0	1.022547688	0.77567935
MIR4255	miRNA	72	0	0	1.022547688	0
MIR941-4|MIR941-3|MIR941-5|MIR941-2	miRNA	72	0.864302741	1.030655296	0	1.551358699
MIR129-1	miRNA	72	0	0	0	0
MIR4648	miRNA	72	0.864302741	0	0	0
MIR941-1	miRNA	72	0	2.061310592	0	0.77567935
MIR548AJ1	miRNA	72	0	0	0	0
MIR8079	miRNA	72	0	0	0	0
MIR6768	miRNA	72	0	0	0	0
MIR451A	miRNA	72	0	1.030655296	0	0
MIR4717	miRNA	72	0	0	0	0
MIR302E	miRNA	72	0	0	0	0
MIR4709	miRNA	72	19.87896304	24.7357271	34.76662138	64.38138602
MIR6875	miRNA	72	1.728605482	1.030655296	0	0
MIR5690	miRNA	73	0	0	0	1.551358699
MIR6876	miRNA	73	0	0	0	0
MIR3189	miRNA	73	0	3.091965887	0	0
MIR548AX	miRNA	73	3.457210964	0	0	1.551358699
MIR6769A	miRNA	73	1.728605482	0	1.022547688	0
MIR3197	miRNA	73	0	0	0	0
MIR383	miRNA	73	0	0	1.022547688	1.551358699
MIR23A	miRNA	73	0.864302741	0	0	2.327038049
MIR4298	miRNA	73	0	0	0	0
MIR134	miRNA	73	0	0	0	0.77567935
MIR3181	miRNA	73	0	0	0	0
MIR5693	miRNA	73	0	0	0	0
MIR6717	miRNA	73	0.864302741	0	0	0.77567935
MIR4493	miRNA	73	0	0	0	0.77567935
MIR3675	miRNA	73	0	0	0	1.551358699
MIR1258	miRNA	73	0	0	0	0.77567935
Z97988.1	miRNA	73	0	1.030655296	0	0.77567935
MIR4322	miRNA	73	0	1.030655296	0	0
MIR146B	miRNA	73	0	0	0	0
MIR6735	miRNA	73	0	0	0	1.551358699
MIR4428	miRNA	73	0	1.030655296	0	0
MIR4429	miRNA	73	4.321513705	15.45982944	0	0.77567935
MIR3610	miRNA	73	1.728605482	3.091965887	2.045095376	6.205434797
MIR485	miRNA	73	0	0	1.022547688	0
MIR1228	miRNA	73	0	0	0	0
MIR1323	miRNA	73	0	0	0	0
MIR4804	miRNA	73	0.864302741	1.030655296	0	0
MIR7154	miRNA	73	0	0	0	0
MIR24-2	miRNA	73	0	0	1.022547688	0.77567935
MIR4785	miRNA	73	0.864302741	1.030655296	2.045095376	0.77567935
MIR1246	miRNA	73	0	0	0	0.77567935
MIR3163	miRNA	73	0	3.091965887	1.022547688	0.77567935
MIR302B	miRNA	73	0.864302741	0	0	1.551358699
MIR3122	miRNA	73	0	0	0	0
MIR1260A	miRNA	73	0	0	0	1.551358699
MIR3591	miRNA	73	0	0	0	0
MIR1208	miRNA	73	0	0	0	0
MIR4487	miRNA	73	0	0	0	0
MIR4505	miRNA	73	2.592908223	4.122621183	0	0.77567935
MIR3194	miRNA	73	0	2.061310592	0	0.77567935
MIR675	miRNA	73	87.29457685	63.90062834	0	0
MIR4671	miRNA	73	8.64302741	8.245242366	4.090190751	10.08383155
MIR499B	miRNA	73	0	0	0	0
MIR4315-1|MIR4315-2	miRNA	73	2.592908223	3.091965887	14.31566763	5.429755448
MIR4651	miRNA	73	0	0	0	0
MIR4659B|MIR4659B	miRNA	73	0	0	0	0
MIR3926-1|MIR3926-1	miRNA	73	0.864302741	0	1.022547688	2.327038049
MIR6778|MIR6778	miRNA	73	0	2.061310592	0	4.654076098
MIR3116-1	miRNA	74	0	0	1.022547688	0.77567935
MIR510	miRNA	74	0	0	0	0
MIR4799	miRNA	74	5.185816446	12.36786355	2.045095376	5.429755448
MIR6821	miRNA	74	2.592908223	3.091965887	1.022547688	0
MIR4768	miRNA	74	0	1.030655296	0	0
MIR3689D1	miRNA	74	0	0	0	1.551358699
MIR4655	miRNA	74	0	0	0	0
MIR4700	miRNA	74	1.728605482	3.091965887	2.045095376	0
MIR4678	miRNA	74	41.48653157	93.78963192	80.78126734	60.50298927
MIR548T	miRNA	74	0.864302741	3.091965887	0	0.77567935
MIR4699	miRNA	74	0	0	0	0
MIR4803	miRNA	74	1.728605482	1.030655296	0	2.327038049
AC008670.1	miRNA	74	595.5045886	500.8984738	161.5625347	57.40027188
MIR548W	miRNA	74	1.728605482	1.030655296	1.022547688	3.878396748
MIR3152	miRNA	74	0	0	0	0
MIR548AM	miRNA	74	0	1.030655296	3.067643063	4.654076098
MIR3134	miRNA	74	3.457210964	17.52114003	1.022547688	10.8595109
MIRLET7A3	miRNA	74	0	0	1.022547688	0
MIR3126	miRNA	74	0	2.061310592	1.022547688	0.77567935
MIR3667	miRNA	74	0	0	0	0
MIR885	miRNA	74	0	0	0	0.77567935
MIR4444-1|MIR4444-2	miRNA	74	6.914421928	11.33720825	16.360763	8.532472846
MIR6853	miRNA	74	0	0	0	0
MIR4739	miRNA	74	2.592908223	6.183931775	0	3.878396748
MIR3684	miRNA	74	0	1.030655296	0	0
MIR6773	miRNA	74	0.864302741	2.061310592	0	0
AC012087.1	miRNA	74	0.864302741	4.122621183	4.090190751	4.654076098
MIR3159	miRNA	74	278.3054826	467.9175043	233.1408728	414.2127727
MIR3171	miRNA	74	0	0	0	0
MIR4751	miRNA	74	2.592908223	7.214587071	0	0.77567935
MIR4695	miRNA	74	0	0	0	0
MIR4771-2|MIR4771-1	miRNA	74	0	0	0	1.551358699
MIR4660|MIR4660	miRNA	74	0.864302741	1.030655296	0	2.327038049
MIR3130-1	miRNA	75	0	7.214587071	0	0
MIR4656	miRNA	75	0	0	0	3.102717399
MIR3165	miRNA	75	0	1.030655296	0	0
MIR92A2	miRNA	75	0	0	0	0.77567935
MIR101-1	miRNA	75	0	0	0	0
MIR1288	miRNA	75	6.050119187	2.061310592	1.022547688	2.327038049
MIR328	miRNA	75	0.864302741	0	8.180381502	0
MIR2110	miRNA	75	0	3.091965887	4.090190751	0.77567935
MIR3123	miRNA	75	0	2.061310592	1.022547688	0
MIR3137	miRNA	75	0.864302741	2.061310592	1.022547688	0
MIR363	miRNA	75	0	0	0	0
MIR8061	miRNA	75	0	2.061310592	0	0
MIR509-3	miRNA	75	0	0	0	0
MIR8053	miRNA	75	0	3.091965887	2.045095376	0
MIR6750	miRNA	75	0	1.030655296	0	0
MIR4679-1	miRNA	75	3.457210964	5.153276479	1.022547688	4.654076098
MIR1226	miRNA	75	0.864302741	0	1.022547688	0
MIR1269B	miRNA	75	0	1.030655296	3.067643063	0
MIR3668	miRNA	75	0	0	1.022547688	1.551358699
MIR4762	miRNA	75	0	1.030655296	0	0
MIR5681A	miRNA	75	4.321513705	27.82769299	9.20292919	15.51358699
MIR4525	miRNA	75	0	1.030655296	0	0.77567935
MIR3132	miRNA	75	0	6.183931775	2.045095376	0.77567935
MIR3118-4|MIR3118-3|MIR3118-2	miRNA	75	0	0	0	0
MIR4704	miRNA	75	0	0	0	0.77567935
MIR4798	miRNA	75	0	0	0	2.327038049
MIR548N	miRNA	75	0	0	0	0.77567935
MIR583	miRNA	75	0	0	0	0
MIR381	miRNA	75	0.864302741	4.122621183	3.067643063	1.551358699
MIR4713	miRNA	75	0	0	0	0
MIR3690	miRNA	75	0	0	0	0
MIR548X	miRNA	75	0	5.153276479	0	0.77567935
MIR8077	miRNA	75	0	0	0	0.77567935
MIR4775	miRNA	75	0	1.030655296	4.090190751	1.551358699
MIR4693	miRNA	75	0	3.091965887	0	0.77567935
MIR892A	miRNA	75	0	0	0	0
MIR631	miRNA	75	0	2.061310592	1.022547688	1.551358699
MIR4458	miRNA	75	0	0	0	0
MIR920	miRNA	75	0	0	0	0
MIR4661	miRNA	75	0	0	0	1.551358699
MIR3156-1	miRNA	75	0	0	0	0.77567935
MIR370	miRNA	75	47.53665076	96.8815978	74.64598121	86.10040781
MIR197	miRNA	75	0	2.061310592	0	0.77567935
MIR3184	miRNA	75	0	0	0	1.551358699
MIR3130-2	miRNA	75	0.864302741	1.030655296	0	0
MIR4670	miRNA	75	0	0	0	0
MIR6739	miRNA	75	0	1.030655296	0	3.878396748
MIR5087	miRNA	76	10.37163289	2.061310592	21.47350144	6.981114147
MIR4733	miRNA	76	0	0	0	0
MIR8060	miRNA	76	0.864302741	0	0	1.551358699
MIR5694	miRNA	76	0	0	0	0
MIR4312	miRNA	76	0.864302741	0	1.022547688	3.878396748
MIR4254	miRNA	76	0.864302741	4.122621183	0	0.77567935
MIR4720	miRNA	76	0	9.275897662	1.022547688	2.327038049
MIR3127	miRNA	76	0	0	0	0
MIR7973-2	miRNA	76	0	1.030655296	0	0
MIR4297	miRNA	76	0	0	0	0
MIR4294	miRNA	76	0	0	0	0
MIR378I	miRNA	76	0	0	0	0.77567935
MIR711	miRNA	76	0	0	0	19.39198374
MIR4781	miRNA	76	0	1.030655296	0	0.77567935
MIR4663	miRNA	76	0	0	0	0
MIR3129	miRNA	76	0	0	0	0
MIR3191	miRNA	76	0	0	0	0.77567935
MIR6502	miRNA	76	1.728605482	1.030655296	2.045095376	2.327038049
MIR4280	miRNA	76	0	1.030655296	0	1.551358699
MIR3139	miRNA	76	0	1.030655296	0	0
MIR875	miRNA	76	0	0	0	0
MIR4730	miRNA	76	0	0	0	0
MIR4650-1|MIR4650-2	miRNA	76	0	1.030655296	0	0.77567935
MIR1200	miRNA	76	0	0	1.022547688	0
MIR7973-1	miRNA	76	0	0	0	0
MIR5682	miRNA	76	0.864302741	0	0	0
MIR548AH	miRNA	76	0	2.061310592	0	0
MIR6881	miRNA	76	0	0	0	0
MIR4654	miRNA	76	0	2.061310592	0	0
MIR4766	miRNA	76	0	0	1.022547688	0.77567935
MIR5683	miRNA	76	0	0	0	0.77567935
MIR5187	miRNA	76	0	0	0	2.327038049
MIR3151	miRNA	76	0	0	0	0
MIR483	miRNA	76	4.321513705	3.091965887	6.135286127	3.102717399
MIR4686	miRNA	76	0	0	0	0.77567935
MIR4500	miRNA	76	0	1.030655296	0	0
MIR4732	miRNA	76	0	0	0	0
MIR3118-1	miRNA	76	0	0	0	2.327038049
MIR4774	miRNA	76	0	2.061310592	1.022547688	1.551358699
MIR382	miRNA	76	0.864302741	2.061310592	0	0
MIR4675	miRNA	77	0	0	0	0
MIR4512	miRNA	77	8.64302741	24.7357271	3.067643063	10.08383155
MIR4420	miRNA	77	0	1.030655296	0	5.429755448
MIR3170	miRNA	77	0	0	0	0
MIR888	miRNA	77	0	0	0	0
MIR3121	miRNA	77	0	4.122621183	1.022547688	2.327038049
MIR208B	miRNA	77	0	0	0	0
MIR4765	miRNA	77	0	1.030655296	0	0
AL031428.2	miRNA	77	45.80804528	65.96193893	21.47350144	26.37309789
MIR4714	miRNA	77	0	3.091965887	1.022547688	0
MIR892C	miRNA	77	0	0	0	0
MIR34C	miRNA	77	5.185816446	8.245242366	2.045095376	6.205434797
MIR1273C	miRNA	77	30.25059594	55.65538597	10.22547688	24.82173919
MIR3148	miRNA	77	0	3.091965887	0	1.551358699
MIR4794	miRNA	77	0.864302741	1.030655296	1.022547688	4.654076098
MIR3925	miRNA	77	0	0	0	0.77567935
MIR892B	miRNA	77	0	1.030655296	0	1.551358699
MIR6512	miRNA	77	0	0	0	0
MIR890	miRNA	77	0	0	0	2.327038049
MIR3161	miRNA	77	1.728605482	1.030655296	0	0
MIR8067	miRNA	77	0	1.030655296	0	2.327038049
MIR933	miRNA	77	0	2.061310592	0	1.551358699
MIR5692C2	miRNA	77	0	1.030655296	0	5.429755448
MIR4757	miRNA	77	0	1.030655296	0	0
MIR26A1	miRNA	77	0	0	0	0
MIR3156-3	miRNA	77	0	0	0	0
MIR596	miRNA	77	0	0	0	0
MIR5687	miRNA	77	0	0	0	0
MIR6715B	miRNA	77	0	0	0	0
MIR4645	miRNA	77	1.728605482	0	1.022547688	6.205434797
MIR4679-2	miRNA	77	0	0	0	0
MIR4506	miRNA	77	0	0	0	0
MIR3175	miRNA	77	0	3.091965887	0	0.77567935
MIR873	miRNA	77	0.864302741	0	0	0
MIR4769	miRNA	77	0	0	0	0.77567935
MIR1972-1|MIR1972-2	miRNA	77	92.48039329	221.5908886	64.42050433	131.8654894
MIR26B	miRNA	77	0	0	0	0
MIR548I4	miRNA	77	3.457210964	3.091965887	1.022547688	1.551358699
MIR3156-2	miRNA	77	1.728605482	1.030655296	0	3.102717399
MIR642B	miRNA	77	0	1.030655296	0	0
MIR1297	miRNA	77	0.864302741	0	0	1.551358699
MIR3192	miRNA	77	0	5.153276479	1.022547688	4.654076098
MIR4784	miRNA	77	0	0	0	3.102717399
MIR5704	miRNA	77	0	0	0	0
MIR3135A	miRNA	77	30.25059594	121.6173249	38.85681214	94.63288066
MIR7703|MIR7703	miRNA	77	0	0	0	0
MIR301B	miRNA	78	0	0	1.022547688	0.77567935
MIR1286	miRNA	78	0	0	0	0
MIR8066	miRNA	78	0	1.030655296	0	0
MIR450B	miRNA	78	1.728605482	7.214587071	2.045095376	3.878396748
MIR656	miRNA	78	0	0	0	0
MIR6895	miRNA	78	0	2.061310592	0	1.551358699
MIR4767	miRNA	78	0	1.030655296	0	0
MIR6071	miRNA	78	0	2.061310592	0	2.327038049
MIR4293	miRNA	78	0	0	0	0.77567935
MIR96	miRNA	78	0	0	2.045095376	0
MIR4773-1	miRNA	78	0	0	0	0
MIR5689	miRNA	78	2.592908223	5.153276479	3.067643063	3.102717399
MIR3117	miRNA	78	0.864302741	1.030655296	0	3.102717399
MIR4756	miRNA	78	0	2.061310592	0	0
MIR8087	miRNA	78	0	0	0	0
MIR3689A	miRNA	78	0	0	0	0
MIR4287	miRNA	78	0	2.061310592	0	0.77567935
MIR3529	miRNA	78	0	0	0	0
MIR6883	miRNA	78	0	0	0	0
MIR3125	miRNA	78	0.864302741	2.061310592	0	0.77567935
MIR103A2	miRNA	78	0.864302741	3.091965887	0	0
MIR4773-2	miRNA	78	0.864302741	0	1.022547688	0
MIR103A1	miRNA	78	0	0	0	0
MIR4697	miRNA	78	0	0	0	0
MIR4538	miRNA	78	0	0	0	0
MIR6884	miRNA	78	0	0	3.067643063	1.551358699
MIR6722	miRNA	78	0	0	0	0
MIR378F	miRNA	78	0	0	0	0
MIR92A1	miRNA	78	0	0	0	0.77567935
MIR4474	miRNA	78	0	0	0	0
MIR5697	miRNA	78	0	4.122621183	0	3.878396748
MIR27A	miRNA	78	0	0	0	0
MIR4772	miRNA	78	0	0	0	0
MIR1290	miRNA	78	0	8.245242366	7.157833815	7.756793497
MIR1193	miRNA	78	0	0	0	0
MIR874	miRNA	78	0	1.030655296	0	2.327038049
MIR4643	miRNA	78	0	0	0	0
MIR3133	miRNA	78	6.050119187	49.4714542	4.090190751	5.429755448
MIR1277	miRNA	78	0	0	0	0
MIR543	miRNA	78	0	0	0	0
MIR3136	miRNA	78	2.592908223	5.153276479	1.022547688	5.429755448
MIR544B	miRNA	78	0.864302741	0	0	1.551358699
MIR1267	miRNA	78	36.30071512	70.08456011	9.20292919	30.25149464
MIR4529	miRNA	78	0	0	0	0
MIR4652	miRNA	78	0	2.061310592	0	0
MIR539	miRNA	78	0	3.091965887	1.022547688	0
MIR1295A	miRNA	79	0	0	0	0
MIR5685	miRNA	79	0	0	0	0
MIR3144	miRNA	79	0.864302741	1.030655296	0	0
MIR1321	miRNA	79	0	1.030655296	0	0.77567935
MIR320B1	miRNA	79	0.864302741	6.183931775	1.022547688	2.327038049
MIR4703	miRNA	79	8.64302741	16.49048473	11.24802457	13.96222829
MIR4782	miRNA	79	0	0	0	0
MIR3202-2	miRNA	79	0.864302741	1.030655296	0	1.551358699
MIR409	miRNA	79	0	0	0	0.77567935
MIR4517	miRNA	79	0.864302741	0	0	2.327038049
MIR6069	miRNA	79	0	0	0	0
MIR3065	miRNA	79	0	0	0	0
MIR5088	miRNA	79	0	0	0	0.77567935
MIR3146	miRNA	79	0	0	0	0
MIR101-2	miRNA	79	0	0	0	0
MIR190B	miRNA	79	0	0	0	0.77567935
SNORD138	miRNA	79	0	1.030655296	1.022547688	0
MIR4633	miRNA	79	0	1.030655296	0	0
MIR6715A	miRNA	79	0	0	0	0
MIR4469	miRNA	79	0	0	1.022547688	0
MIR6780B	miRNA	79	0	1.030655296	0	0
MIR3617	miRNA	79	0	0	0	0
MIR4665	miRNA	79	0	3.091965887	0	0.77567935
MIR891A	miRNA	79	7.778724669	15.45982944	9.20292919	11.63519025
MIR563	miRNA	79	0	0	1.022547688	3.878396748
MIR4635	miRNA	79	0.864302741	0	0	0
MIR7850	miRNA	79	1.728605482	2.061310592	0	0
MIR887	miRNA	79	0	0	0	1.551358699
MIR3620	miRNA	79	5.185816446	15.45982944	3.067643063	6.981114147
MIR891B	miRNA	79	2.592908223	10.30655296	3.067643063	9.308152196
MIR7843	miRNA	79	0	0	0	0
MIR484	miRNA	79	2.592908223	0	0	0
MIR4790	miRNA	79	0	0	0	0
MIR6801	miRNA	79	0.864302741	0	0	0
MIR500B	miRNA	79	0	1.030655296	1.022547688	0
MIR889	miRNA	79	0	0	0	0
MIRLET7E	miRNA	79	0	0	0	0
MIR601	miRNA	79	0	1.030655296	0	0
MIR378E	miRNA	79	0	0	1.022547688	0
MIR7974	miRNA	79	0	0	0	0
MIR4715	miRNA	79	0	0	0	0
MIR4666A|MIR4666A	miRNA	79	0	0	0	0.77567935
MIR4435-1|MIR4435-2	miRNA	80	4.321513705	3.091965887	6.135286127	11.63519025
MIR5706	miRNA	80	0	1.030655296	0	0
MIR8075	miRNA	80	2.592908223	4.122621183	4.090190751	4.654076098
MIR487A	miRNA	80	0.864302741	0	1.022547688	0.77567935
MIR4760	miRNA	80	0	0	0	0
MIR6716	miRNA	80	0	0	0	0
MIR6718	miRNA	80	0	0	0	0.77567935
MIR329-1	miRNA	80	0	0	0	0
MIR2117	miRNA	80	0	1.030655296	0	0
MIR548V	miRNA	80	0	0	0	3.102717399
MIR3150A	miRNA	80	0	0	0	0
MIR4321	miRNA	80	0.864302741	1.030655296	0	0.77567935
MIR4800	miRNA	80	6.914421928	8.245242366	3.067643063	4.654076098
MIR4802	miRNA	80	0	2.061310592	0	0
MIR2114	miRNA	80	0	0	0	0
MIR100	miRNA	80	0.864302741	0	0	0
MIR1910	miRNA	80	0	0	0	1.551358699
MIR3689D2	miRNA	80	0	0	0	0.77567935
MIR3198-1	miRNA	80	2.592908223	0	0	0.77567935
MIR760	miRNA	80	0	0	0	0
MIR8072	miRNA	80	6.050119187	2.061310592	9.20292919	6.205434797
MIR5190	miRNA	80	0	2.061310592	0	0
MIR4636	miRNA	80	0	0	0	0
MIR4647	miRNA	80	5.185816446	9.275897662	11.24802457	11.63519025
MIR1908	miRNA	80	0.864302741	0	0	0
MIR3609	miRNA	80	0	0	0	0
MIR4786	miRNA	80	0	0	0	0
MIR4776-1	miRNA	80	0	0	0	0
MIR4776-2	miRNA	80	0	0	0	0
MIR4778	miRNA	80	0	0	0	1.551358699
MIR4439	miRNA	80	0	0	0	0
MIR1913	miRNA	80	0	0	0	0
MIR1912	miRNA	80	2.592908223	2.061310592	0	3.102717399
MIR147B	miRNA	80	6.050119187	5.153276479	0	0
MIR4677	miRNA	80	0	0	0	1.551358699
MIR3198-2	miRNA	80	10.37163289	12.36786355	10.22547688	6.981114147
MIR4694	miRNA	80	0	4.122621183	2.045095376	0
MIR1914	miRNA	80	0	1.030655296	0	0
MIR4698	miRNA	80	0	0	0	0
MIR514B	miRNA	80	0	5.153276479	0	0
MIR296	miRNA	80	0	0	0	0
MIR4707	miRNA	80	6.914421928	6.183931775	20.45095376	17.06494569
MIR4788	miRNA	80	0	0	0	0
MIR376A2	miRNA	80	0	0	0	0
MIR4682	miRNA	80	0	0	0	0
MIR410	miRNA	80	0	0	0	0.77567935
MIR93	miRNA	80	0	4.122621183	0	0.77567935
MIR1911	miRNA	80	0	1.030655296	0	3.878396748
MIR4472-1	miRNA	80	4.321513705	1.030655296	3.067643063	1.551358699
MIR7107	miRNA	80	0	0	0	0
MIR1909	miRNA	80	0	0	0	0.77567935
MIR4687	miRNA	80	1.728605482	7.214587071	7.157833815	11.63519025
MIR4423	miRNA	80	0	0	0	0.77567935
MIR3190	miRNA	80	0	0	0	0
MIR5739	miRNA	80	0	2.061310592	0	0
MIR2116	miRNA	80	0	0	0	0
MIRLET7A1	miRNA	80	0	1.030655296	1.022547688	1.551358699
MIR4492	miRNA	80	0	1.030655296	0	0.77567935
MIR1275	miRNA	80	0	0	0	0
MIR4283-2|MIR4283-1	miRNA	80	0	0	0	0
MIR1915	miRNA	80	0.864302741	1.030655296	0	0
MIR1234|MIR1234	miRNA	80	0.864302741	0	0	0.77567935
MIR4780	miRNA	81	0	0	0	0
MIR1278	miRNA	81	0	0	0	0
MIR3158-2	miRNA	81	0	0	0	0.77567935
MIR8074	miRNA	81	0.864302741	1.030655296	0	1.551358699
MIR4284	miRNA	81	0	1.030655296	0	0.77567935
MIR4308	miRNA	81	0	1.030655296	0	0
MIR95	miRNA	81	0	0	0	0
MIR4723	miRNA	81	0.864302741	3.091965887	0	6.205434797
MIR876	miRNA	81	0	1.030655296	0	0
MIR99A	miRNA	81	0	0	0	0
MIR3160-2	miRNA	81	0	5.153276479	0	0
MIR6834	miRNA	81	0.864302741	2.061310592	3.067643063	0
MIR4433A	miRNA	81	0	0	0	0
MIR4477B	miRNA	81	0	2.061310592	3.067643063	3.878396748
MIR378C	miRNA	81	0	1.030655296	2.045095376	0
MIR922	miRNA	81	6.914421928	8.245242366	2.045095376	0
MIR4737	miRNA	81	54.45107269	107.1881508	4.090190751	6.205434797
MIR4666B	miRNA	81	0.864302741	3.091965887	5.112738439	0.77567935
MIR29B2	miRNA	81	0	3.091965887	0	0.77567935
MIR6516	miRNA	81	5.185816446	3.091965887	24.54114451	8.532472846
MIR4477A	miRNA	81	0	3.091965887	0	1.551358699
MIR3074	miRNA	81	0	0	0	0
MIR29B1	miRNA	81	0	0	0	0.77567935
MIR4502	miRNA	81	1.728605482	10.30655296	0	1.551358699
MIR6831	miRNA	81	0	6.183931775	0	6.205434797
MIR105-1	miRNA	81	0	0	0	0
MIR5707	miRNA	81	0	0	2.045095376	0
MIR8059	miRNA	81	0	0	0	0
MIR106A	miRNA	81	0	0	0	0
MIR654	miRNA	81	0.864302741	0	0	0.77567935
MIR1181	miRNA	81	15.55744934	18.55179532	38.85681214	35.68125008
MIR4515	miRNA	81	0	0	0	0
MIR4318	miRNA	81	0	0	0	0
MIR519B	miRNA	81	0	0	0	0
MIR8063	miRNA	81	0.864302741	0	1.022547688	2.327038049
MIR3202-1	miRNA	81	0	0	0	0.77567935
MIR548U	miRNA	81	0	6.183931775	1.022547688	0
MIR4662B	miRNA	81	0.864302741	0	0	0.77567935
MIR2467	miRNA	81	0	0	3.067643063	1.551358699
MIR4672	miRNA	81	0.864302741	8.245242366	1.022547688	0.77567935
MIR224	miRNA	81	0	0	2.045095376	0.77567935
MIR16-2	miRNA	81	0	3.091965887	0	0
MIR3120	miRNA	81	0.864302741	0	0	1.551358699
MIR6785	miRNA	81	0.864302741	0	0	0
MIR4796	miRNA	81	1.728605482	18.55179532	1.022547688	3.878396748
MIR105-2	miRNA	81	0	0	0	0.77567935
MIR107	miRNA	81	0	0	0	1.551358699
MIR3158-1	miRNA	81	0	0	0	0
MIR4683	miRNA	81	0.864302741	0	3.067643063	6.205434797
MIR8082	miRNA	81	2.592908223	0	0	3.102717399
MIR3924	miRNA	81	1.728605482	17.52114003	1.022547688	7.756793497
MIR494	miRNA	81	0.864302741	0	0	0
MIR4659A|MIR4659A	miRNA	81	0.864302741	1.030655296	0	0
MIR106B	miRNA	82	0	1.030655296	0	1.551358699
MIR6077	miRNA	82	3.457210964	0	3.067643063	0
MIR323B	miRNA	82	0	0	0	0
MIR1301	miRNA	82	0	1.030655296	0	0
MIR548AD	miRNA	82	0.864302741	0	0	0.77567935
MIR3155A	miRNA	82	0	0	0	0.77567935
MIR548S	miRNA	82	0	3.091965887	0	0.77567935
MIR130B	miRNA	82	0	0	0	0
MIR5701-1|MIR5701-2|MIR5701-3	miRNA	82	0	0	0	0
MIR495	miRNA	82	0	0	0	0
MIR4761	miRNA	82	0	0	0	0.77567935
MIR4706	miRNA	82	0	0	0	0
MIR3162	miRNA	82	0	1.030655296	0	1.551358699
MIR320A	miRNA	82	0	0	0	0
MIR3168	miRNA	82	0	2.061310592	0	0
MIR3145	miRNA	82	0	0	0	0
MIR7852	miRNA	82	0	0	0	0
MIR664A	miRNA	82	0	1.030655296	0	2.327038049
MIR3153	miRNA	82	7.778724669	8.245242366	3.067643063	17.84062504
MIR8056	miRNA	82	1.728605482	7.214587071	3.067643063	2.327038049
MIR4267	miRNA	82	6.914421928	10.30655296	2.045095376	5.429755448
MIR6800	miRNA	82	0	0	0	0
MIR185	miRNA	82	0	0	0	0
MIR4712	miRNA	82	0.864302741	1.030655296	0	5.429755448
MIR4684	miRNA	82	0	0	0	0
MIR1261	miRNA	82	0	0	3.067643063	0
MIR1233-1|MIR1233-2	miRNA	82	0	0	0	0
MIR128-1	miRNA	82	0	5.153276479	0	2.327038049
MIR19A	miRNA	82	0	0	0	0
MIR136	miRNA	82	0	0	0	0
MIR8089	miRNA	82	0	1.030655296	0	1.551358699
MIR3138	miRNA	82	0	1.030655296	0	0
MIR4744	miRNA	82	0	1.030655296	0	4.654076098
MIR4748	miRNA	82	0	0	1.022547688	0.77567935
MIR3142	miRNA	82	0.864302741	2.061310592	0	0
MIR4642	miRNA	82	0	0	0	0.77567935
MIR3177	miRNA	82	0	2.061310592	0	1.551358699
MIR4783	miRNA	82	0	2.061310592	1.022547688	3.102717399
MIR3672	miRNA	82	0	0	0	0
MIR3683	miRNA	82	0	0	0	0
MIR3910-2	miRNA	82	0	2.061310592	0	1.551358699
MIR4801	miRNA	82	0	0	0	1.551358699
MIR216B	miRNA	82	0	0	1.022547688	0.77567935
MIR939|MIR939	miRNA	82	0	1.030655296	1.022547688	0
MIR4789|MIR4789	miRNA	82	0	0	0	1.551358699
MIR3611	miRNA	83	0	0	0	0
MIR3164	miRNA	83	0	0	0	0
MIR762	miRNA	83	16.42175208	4.122621183	5.112738439	0
MIR3655	miRNA	83	3.457210964	11.33720825	7.157833815	4.654076098
MIR4503	miRNA	83	0	0	0	0
MIR1276	miRNA	83	0	0	0	0.77567935
MIR504	miRNA	83	0	0	0	0
MIR3923	miRNA	83	0	1.030655296	0	0
MIR15A	miRNA	83	0	1.030655296	0	0
MIR4263	miRNA	83	1.728605482	3.091965887	3.067643063	0.77567935
MIRLET7F2	miRNA	83	0	0	0	0
MIR300	miRNA	83	0	1.030655296	0	0
MIR4518	miRNA	83	0	0	0	0
MIR8076	miRNA	83	0	0	0	0
MIR1270	miRNA	83	0	0	0	1.551358699
MIR4759	miRNA	83	0	0	0	0
MIR605	miRNA	83	0	0	0	0
MIR4309	miRNA	83	0	1.030655296	0	0
MIR4471	miRNA	83	4.321513705	8.245242366	3.067643063	2.327038049
MIR3622A	miRNA	83	0	2.061310592	0	1.551358699
MIR193B	miRNA	83	0	2.061310592	0	0
MIR934	miRNA	83	1.728605482	2.061310592	0	0
MIR3619	miRNA	83	0	0	0	0
MIR3169	miRNA	83	0	0	0	0.77567935
MIR1202	miRNA	83	2.592908223	0	0	3.102717399
MIR588	miRNA	83	0	0	0	0
MIR429	miRNA	83	0	5.153276479	4.090190751	1.551358699
MIR526B	miRNA	83	1.728605482	5.153276479	1.022547688	6.205434797
MIR4779	miRNA	83	0	0	0	0
MIR4688	miRNA	83	0	0	0	0.77567935
MIR938	miRNA	83	0.864302741	2.061310592	3.067643063	0
MIR5688	miRNA	83	0	0	0	0.77567935
MIR4653	miRNA	83	0	0	0	0
MIR548AN	miRNA	83	0	3.091965887	0	0
MIR515-2|MIR515-1	miRNA	83	0	0	0	0
MIRLET7B	miRNA	83	0	1.030655296	0	0.77567935
MIR1299	miRNA	83	0	4.122621183	0	5.429755448
MIR1238	miRNA	83	0	0	0	1.551358699
MIR518B	miRNA	83	0	0	0	0
MIR378H	miRNA	83	0	3.091965887	0	0
MIR3149	miRNA	83	12.10023837	26.79703769	7.157833815	11.63519025
MIR488	miRNA	83	0.864302741	5.153276479	0	0.77567935
MIR4484	miRNA	83	0	1.030655296	0	0
MIR324	miRNA	83	0	0	3.067643063	2.327038049
MIR4422	miRNA	83	0	0	1.022547688	0
MIR4753	miRNA	83	0	0	0	0
MIR8078	miRNA	84	0	3.091965887	0	1.551358699
MIR501	miRNA	84	0	0	2.045095376	0
MIR4719	miRNA	84	0	0	0	0
MIR3154	miRNA	84	0.864302741	0	0	0
MIR184	miRNA	84	0	0	0	0
MIR6165	miRNA	84	0	0	1.022547688	0
MIR150	miRNA	84	0	0	0	0
MIR4494	miRNA	84	0	0	0	0.77567935
MIR5680	miRNA	84	0	0	0	0
MIR4277	miRNA	84	0	0	0	0
MIR513B	miRNA	84	0	6.183931775	0	1.551358699
MIR3682	miRNA	84	0	2.061310592	2.045095376	0
MIR17	miRNA	84	0	0	0	3.878396748
MIR3195	miRNA	84	0	1.030655296	0	0
MIR4490	miRNA	84	0	0	0	0
MIR3922	miRNA	84	0	0	0	0
MIR541	miRNA	84	0	0	0	0
MIR3178	miRNA	84	0	1.030655296	1.022547688	1.551358699
MIR154	miRNA	84	0	0	0	0
MIR4273	miRNA	84	5.185816446	7.214587071	6.135286127	6.981114147
MIR5089	miRNA	84	0	1.030655296	0	0
MIR489	miRNA	84	0	0	0	0
MIR548P	miRNA	84	0	2.061310592	0	0.77567935
MIR3183	miRNA	84	1.728605482	0	0	0
MIR2392	miRNA	84	0.864302741	0	0	0.77567935
MIR5702	miRNA	84	0	0	0	0
MIR548AB	miRNA	84	0	0	0	0
MIR34B	miRNA	84	0	0	0	0
MIR4425	miRNA	84	2.592908223	2.061310592	0	1.551358699
MIRLET7I	miRNA	84	0.864302741	2.061310592	1.022547688	0.77567935
MIR500A	miRNA	84	0	0	1.022547688	0
MIR487B	miRNA	84	0	0	0	0
MIR25	miRNA	84	2.592908223	8.245242366	0	3.102717399
MIR4791	miRNA	84	0	0	0	0.77567935
MIRLET7C	miRNA	84	0	1.030655296	0	0
MIR26A2	miRNA	84	0.864302741	0	0	0
MIR196B	miRNA	84	0	0	0	0
MIR513C	miRNA	84	0	0	0	0
MIR491	miRNA	84	0	2.061310592	0	0
MIR4432	miRNA	84	0	0	0	0.77567935
MIR128-2	miRNA	84	0	0	0	0
MIRLET7G	miRNA	84	0	3.091965887	0	1.551358699
MIR4269	miRNA	84	0	1.030655296	0	0
MIR1285-1	miRNA	84	457.21615	1135.782136	363.0044292	887.377176
MIR4787	miRNA	84	0.864302741	0	0	0
MIR7161	miRNA	84	6.050119187	10.30655296	4.090190751	10.8595109
MIR1266	miRNA	84	0	0	0	0.77567935
MIR138-2	miRNA	84	0	0	0	0
MIR519E	miRNA	84	0	0	0	0
MIR466	miRNA	84	0	8.245242366	0	1.551358699
MIR4307	miRNA	84	0	0	0	0
MIR3179-1|MIR3179-3|MIR3179-2|MIR3179-4	miRNA	84	0	0	0	0.77567935
MIR505	miRNA	84	0	2.061310592	0	0
MIR4716	miRNA	84	0	1.030655296	0	1.551358699
MIR4637	miRNA	84	0	0	0	0
MIR3646	miRNA	84	0	0	0	0
MIR4644	miRNA	84	0	2.061310592	1.022547688	1.551358699
MIR548F1	miRNA	84	0	1.030655296	0	8.532472846
MIR1343	miRNA	84	0	0	0	0
MIR329-2	miRNA	84	0	0	0	0
MIR194-2	miRNA	85	0.864302741	2.061310592	0	0
MIR421	miRNA	85	1.728605482	9.275897662	0	2.327038049
MIR1-2	miRNA	85	0	0	0	0.77567935
MIR5090	miRNA	85	0	0	0	0
MIR3200	miRNA	85	0	1.030655296	0	0
MIR625	miRNA	85	0	0	0	0.77567935
MIR3188	miRNA	85	0.864302741	0	0	0
MIR4295	miRNA	85	0	4.122621183	0	0
MIR4319	miRNA	85	0	0	0	0
MIR526A1	miRNA	85	0	0	0	0
MIR1203	miRNA	85	0	0	0	0
MIR1306	miRNA	85	7.778724669	8.245242366	7.157833815	9.308152196
MIR452	miRNA	85	0	2.061310592	0	0.77567935
MIR5695	miRNA	85	0	2.061310592	2.045095376	3.102717399
MIR520A	miRNA	85	0	0	0	0
MIR194-1	miRNA	85	1.728605482	0	0	0
MIR5708	miRNA	85	119.2737783	390.6183571	112.4802457	283.1229626
MIR4327	miRNA	85	0	0	0	0
MIR516B2	miRNA	85	0	0	0	0
MIR6511B1|MIR6511B2	miRNA	85	0.864302741	0	0	0
MIR5696	miRNA	85	0	2.061310592	0	0
MIR6509	miRNA	85	10.37163289	5.153276479	2.045095376	2.327038049
MIR190A	miRNA	85	0	1.030655296	0	0
MIR3119-1	miRNA	85	0	0	3.067643063	1.551358699
MIR4691	miRNA	85	0	2.061310592	4.090190751	1.551358699
MIR4436A	miRNA	85	0	0	0	0
MIR764	miRNA	85	5.185816446	7.214587071	3.067643063	6.205434797
MIR3119-2	miRNA	85	0	0	1.022547688	0
MIR525	miRNA	85	0	1.030655296	0	0
MIR122	miRNA	85	0	0	0	0
MIR527	miRNA	85	0	0	0	0
MIR518A1	miRNA	85	0	0	0	0
MIR4742	miRNA	85	0.864302741	1.030655296	0	0
MIR3160-1	miRNA	85	0.864302741	1.030655296	0	0
MIR5094	miRNA	85	3.457210964	9.275897662	3.067643063	13.18654894
MIR3921	miRNA	85	0	0	0	0
MIR519A1	miRNA	85	0	0	0	0
MIR3186	miRNA	85	0.864302741	0	1.022547688	0.77567935
MIR6124	miRNA	85	0	0	0	0.77567935
MIR1224	miRNA	85	0	0	0	0
MIR4285	miRNA	85	0	0	0	0
MIR3167	miRNA	85	0	1.030655296	0	0
MIR126	miRNA	85	0	0	0	0
MIR3157	miRNA	85	0	2.061310592	0	0.77567935
MIR22	miRNA	85	1.728605482	4.122621183	10.22547688	10.8595109
MIR3621	miRNA	85	0	0	0	0
MIR8062	miRNA	85	0	0	0	0
MIR1244-4|MIR1244-4|MIR1244-1|MIR1244-3|MIR1244-2	miRNA	85	1648.225327	1128.567549	843.6018424	532.1160339
MIR124-1|MIR124-1	miRNA	85	0	0	0	0
MIR301A	miRNA	86	0.864302741	4.122621183	1.022547688	1.551358699
MIR7110	miRNA	86	94.20899877	546.2473068	77.71362427	278.4688865
AL358013.1	miRNA	86	137.4241358	270.0316875	143.1566763	203.2279896
MIR502	miRNA	86	0	2.061310592	0	0
MIR125A	miRNA	86	0	0	1.022547688	0
MIR4448	miRNA	86	0	2.061310592	0	8.532472846
MIR3614	miRNA	86	1.728605482	1.030655296	2.045095376	3.102717399
MIR4478	miRNA	86	0	0	0	0
MIR1185-1	miRNA	86	1.728605482	0	0	0.77567935
MIR942	miRNA	86	0	0	0	0
MIR323A	miRNA	86	0	0	0	0
MIR8054	miRNA	86	0.864302741	9.275897662	0	0.77567935
MIR1265	miRNA	86	1.728605482	1.030655296	0	0.77567935
MIR206	miRNA	86	0	0	0	0
MIR203B	miRNA	86	0	0	0	0
MIR1303	miRNA	86	14.6931466	16.49048473	5.112738439	18.61630439
MIR1468	miRNA	86	0	0	0	0
MIR3150B	miRNA	86	0	1.030655296	0	0.77567935
MIR877	miRNA	86	0	1.030655296	1.022547688	0
MIR548F5	miRNA	86	1.728605482	4.122621183	2.045095376	3.102717399
MIR6762	miRNA	86	0.864302741	1.030655296	3.067643063	1.551358699
MIR1185-2	miRNA	86	0.864302741	0	0	0
MIR28	miRNA	86	1.728605482	2.061310592	0	3.102717399
MIR548M	miRNA	86	0	0	0	0
MIR4513	miRNA	86	0	0	0	0
MIR4257	miRNA	86	0.864302741	0	0	3.878396748
MIR4424	miRNA	86	1.728605482	3.091965887	0	2.327038049
MIR1305	miRNA	86	0.864302741	0	0	0.77567935
MIR188	miRNA	86	0	0	0	0
MIR4460	miRNA	86	0	1.030655296	1.022547688	2.327038049
MIR1271	miRNA	86	2.592908223	0	0	1.551358699
MIR8069-2|MIR8069-1	miRNA	86	0	5.153276479	0	0
MIR6500	miRNA	86	0.864302741	1.030655296	1.022547688	0.77567935
MIR3920	miRNA	86	0	0	0	0
MIR8088	miRNA	86	0	1.030655296	0	0
MIR1263	miRNA	86	0	0	0	0
MIR4777	miRNA	86	0	2.061310592	0	0
MIR937	miRNA	86	0	2.061310592	0	0
MIR3686	miRNA	86	0.864302741	0	0	0
MIR548L	miRNA	86	7.778724669	16.49048473	5.112738439	6.205434797
MIR6503	miRNA	86	0.864302741	0	0	0
MIR4516	miRNA	86	1.728605482	5.153276479	0	3.102717399
MIR144	miRNA	86	0	0	0	0
MIR3199-2	miRNA	86	0	0	0	0
MIR186	miRNA	86	0	1.030655296	0	3.102717399
MIR6765	miRNA	87	0.864302741	0	0	0
MIR519C	miRNA	87	0	0	0	0.77567935
MIR521-1	miRNA	87	0	0	0	0
MIR4738	miRNA	87	0	0	0	0
MIR124-3	miRNA	87	0	0	0	0
MIR1291	miRNA	87	0	5.153276479	0	2.327038049
MIR9-2	miRNA	87	0.864302741	3.091965887	1.022547688	0.77567935
MIR519A2	miRNA	87	0	0	0	0.77567935
MIR2355	miRNA	87	0	0	0	0
MIR548F3	miRNA	87	0.864302741	6.183931775	1.022547688	0.77567935
MIR142	miRNA	87	0	0	0	0.77567935
MIR4275	miRNA	87	0.864302741	4.122621183	2.045095376	0
MIR518A2	miRNA	87	0	0	0	0
MIR518D	miRNA	87	0	0	0	0
MIR195	miRNA	87	0	0	0	0.77567935
MIR1283-2	miRNA	87	0	0	0	0
MIR6721	miRNA	87	0	0	1.022547688	3.102717399
MIR518F	miRNA	87	0	0	0	0
MIR3615	miRNA	87	40.62222883	44.31817772	9.20292919	0.77567935
MIR3612	miRNA	87	0	0	0	0
MIR520C	miRNA	87	0	0	0	0
MIR4522	miRNA	87	0	0	0	0
MIR425	miRNA	87	3.457210964	2.061310592	2.045095376	0
MIR152	miRNA	87	1.728605482	1.030655296	0	2.327038049
MIR523	miRNA	87	0	0	0	0
MIR153-2	miRNA	87	0	0	0	0.77567935
MIRLET7F1	miRNA	87	0	3.091965887	0	0.77567935
MIR522	miRNA	87	0	2.061310592	0	0
MIR4793	miRNA	87	0	1.030655296	0	0
MIR3174	miRNA	87	0.864302741	1.030655296	0	0.77567935
MIRLET7D	miRNA	87	2.592908223	8.245242366	5.112738439	5.429755448
MIR4526	miRNA	87	0	0	0	0
MIR520E	miRNA	87	0	0	0	0
MIR4511	miRNA	87	18.15035756	35.04228006	9.20292919	13.96222829
MIR520F	miRNA	87	0	0	0	0
MIR3688-2	miRNA	87	0	0	0	1.551358699
MIR517A	miRNA	87	0	0	0	0
MIR19B1	miRNA	87	0	0	0	0.77567935
MIR524	miRNA	87	0	0	0	0
MIR1283-1	miRNA	87	0	1.030655296	0	0
MIR520D	miRNA	87	0	0	0	0
MIR1207	miRNA	87	2.592908223	1.030655296	1.022547688	2.327038049
MIR4674	miRNA	87	0	1.030655296	0	0
MIR511	miRNA	87	0	0	0	0
MIR521-2	miRNA	87	0	0	0	0
MIR5692B	miRNA	87	0	8.245242366	1.022547688	3.878396748
MIR365A	miRNA	87	0	1.030655296	1.022547688	0
MIR3613	miRNA	87	2.592908223	0	0	0
MIR7108	miRNA	87	0	1.030655296	0	0
MIR3972|MIR3972	miRNA	87	0	0	0	0
MIR6719|MIR6719	miRNA	87	0.864302741	1.030655296	0	2.327038049
MIR3680-1|MIR3680-1|MIR3680-2	miRNA	87	0.864302741	1.030655296	0	0
MIR4296	miRNA	88	0	3.091965887	0	0
MIR758	miRNA	88	0	0	0	0
MIR520H	miRNA	88	0	0	0	0
MIR1227	miRNA	88	0	1.030655296	2.045095376	0
MIR548E	miRNA	88	0	0	0	0
MIR320C1	miRNA	88	0	0	0	0
MIR133A1	miRNA	88	0	0	0	0
MIR708	miRNA	88	0	0	0	1.551358699
MIR4536-2	miRNA	88	0	0	0	1.551358699
AC099677.7	miRNA	88	292.9986292	554.4925491	313.9221402	594.1703818
MIR8070	miRNA	88	0	0	0	0
MIR944	miRNA	88	0	0	0	0
MIR3671	miRNA	88	0	0	0	0.77567935
MIR4536-1	miRNA	88	3.457210964	23.7050718	3.067643063	19.39198374
MIR145	miRNA	88	0	0	0	0
MIR548AC	miRNA	88	0	1.030655296	1.022547688	0.77567935
MIR5092	miRNA	88	0	0	0	0.77567935
MIR519D	miRNA	88	0	0	0	0
MIR384	miRNA	88	0.864302741	0	0	0
MIR514A2|MIR514A3	miRNA	88	0	0	0	0
MIR193A	miRNA	88	0.864302741	1.030655296	0	0
MIR518E	miRNA	88	0	0	0	0
MIR30B	miRNA	88	0	0	0	0
MIR548AI	miRNA	88	0.864302741	5.153276479	1.022547688	3.102717399
MIR1285-2	miRNA	88	6.050119187	22.67441651	5.112738439	6.981114147
MIR125B1	miRNA	88	0	0	0	0
MIR3199-1	miRNA	88	0	0	0	0
MIR548H2	miRNA	88	0.864302741	6.183931775	1.022547688	9.308152196
MIR4764	miRNA	88	0	0	0	0
MIR3618	miRNA	88	4.321513705	10.30655296	3.067643063	4.654076098
MIR298	miRNA	88	0	2.061310592	0	0
MIR219B	miRNA	88	0	0	0	0
MIR29C	miRNA	88	0	1.030655296	0	3.102717399
MIR1197	miRNA	88	0	0	0	0
MIR4453	miRNA	89	2.592908223	7.214587071	0	0.77567935
MIR6126	miRNA	89	4.321513705	3.091965887	0	0
MIR2276	miRNA	89	0.864302741	0	0	0
MIR5705	miRNA	89	0	0	0	0
AC114498.2	miRNA	89	5238.538914	6100.448696	3890.793952	1736.746064
MIR4795	miRNA	89	0	0	0	0
MIR125B2	miRNA	89	0.864302741	0	0	0
MIR661	miRNA	89	1.728605482	1.030655296	0	0
MIR30C1	miRNA	89	0	0	0	0
MIR8083	miRNA	89	0	1.030655296	1.022547688	3.102717399
MIR3919	miRNA	89	0	0	0	0.77567935
MIR548G	miRNA	89	0	0	0	0.77567935
MIR8080	miRNA	89	0	0	0	0.77567935
MIR4754	miRNA	89	0	0	3.067643063	0
MIR130A	miRNA	89	7.778724669	8.245242366	0	0
MIR8058	miRNA	89	0	0	0	0
MIR4497	miRNA	89	0	0	0	0
MIR9-1	miRNA	89	0	0	0	0
MIR4724	miRNA	89	1.728605482	7.214587071	0	0
MIR1260B	miRNA	89	0	1.030655296	1.022547688	3.878396748
MIR8084	miRNA	89	3.457210964	0	1.022547688	0
MIR493	miRNA	89	0	1.030655296	1.022547688	0
MIR4721	miRNA	89	9.507330152	26.79703769	25.56369219	24.82173919
MIR1183	miRNA	89	0	0	0	0
MIR6073	miRNA	89	0	1.030655296	0	1.551358699
MIR6728	miRNA	89	0	0	3.067643063	1.551358699
MIR16-1	miRNA	89	0	0	0	0
MIR181B2	miRNA	89	0	0	0	4.654076098
MIR149	miRNA	89	0	2.061310592	0	0.77567935
MIR4741	miRNA	90	1.728605482	1.030655296	4.090190751	1.551358699
MIR2861	miRNA	90	0.864302741	0	0	0
MIR1225	miRNA	90	1.728605482	0	0	0
MIR3176	miRNA	90	0.864302741	0	0	0
MIR6863	miRNA	90	0	0	0	0
MIR4725	miRNA	90	0	0	0	0
MIR4640	miRNA	90	3.457210964	0	0	0
MIR129-2	miRNA	90	0	0	0	0
MIR151A	miRNA	90	0	0	0	1.551358699
MIR1302-6	miRNA	90	0.864302741	4.122621183	3.067643063	1.551358699
MIR3691	miRNA	90	0.864302741	0	1.022547688	0
MIR4528	miRNA	90	0	1.030655296	0	0
MIR1287	miRNA	90	4.321513705	8.245242366	7.157833815	3.102717399
MIR614	miRNA	90	2.592908223	5.153276479	3.067643063	8.532472846
MIR422A	miRNA	90	1.728605482	0	0	0
MIR516A1	miRNA	90	0	0	0	0
MIR135A1	miRNA	90	0	0	0	2.327038049
MIR9-3	miRNA	90	0	0	0	0
MIR520G	miRNA	90	0	0	0	0
MIR516B1	miRNA	90	0	0	0	0
MIR200A	miRNA	90	0	0	0	0
MIR3651	miRNA	90	1.728605482	8.245242366	0	10.08383155
MIR4325	miRNA	90	0.864302741	0	0	0.77567935
MIR5699	miRNA	90	0	0	3.067643063	0
MIR153-1	miRNA	90	0	0	0	0
MIR8064	miRNA	90	0	0	2.045095376	0
MIR3140	miRNA	90	0	4.122621183	0	0
MIR516A2	miRNA	90	0	0	0	0
MIR8485	miRNA	91	2428.690702	7382.583884	1679.023303	4084.727455
MIR5692C1	miRNA	91	0	1.030655296	0	0.77567935
MIR1178	miRNA	91	2.592908223	0	1.022547688	0.77567935
MIR759	miRNA	91	0	2.061310592	0	0
MIR3960	miRNA	91	0.864302741	1.030655296	0	0
MIR4999	miRNA	91	0.864302741	6.183931775	0	3.878396748
MIR2113	miRNA	91	0	0	0	0
MIR4306	miRNA	91	0	3.091965887	0	0
MIR4447	miRNA	91	0	0	0	0
MIR4274	miRNA	91	0	0	0	0
MIR450A1	miRNA	91	0.864302741	2.061310592	0	0
MIR412	miRNA	91	0	0	0	0
MIR1304	miRNA	91	0.864302741	4.122621183	0	11.63519025
MIR4436B2|MIR4436B1	miRNA	91	0	0	0	0
MIR449A	miRNA	91	0	0	0	0
MIR544A	miRNA	91	0	0	0	0.77567935
MIR1179	miRNA	91	0	0	0	0
MIR4473	miRNA	91	0	0	0	0
MIR4258	miRNA	91	0	1.030655296	1.022547688	2.327038049
MIR935	miRNA	91	0	0	1.022547688	0
MIR2053	miRNA	91	0	0	0	0.77567935
MIR532	miRNA	91	0	0	0	0
MIR548AJ2	miRNA	92	1.728605482	19.58245062	4.090190751	11.63519025
MIR3166	miRNA	92	9.507330152	22.67441651	5.112738439	9.308152196
MIR191	miRNA	92	0	0	0	0
MIR4504	miRNA	92	0	0	0	0
MIR6724-4|MIR6724-1|MIR6724-2|MIR6724-3	miRNA	92	0.864302741	18.55179532	0	1.551358699
MIR5192	miRNA	92	0	1.030655296	0	0.77567935
MIR449C	miRNA	92	1.728605482	0	3.067643063	0.77567935
MIR4464	miRNA	92	0	0	0	0
MIR1231	miRNA	92	0	0	0	0
MIR30E	miRNA	92	0	0	0	0
MIR1296	miRNA	92	0	0	0	0
MIR6807	miRNA	92	2.592908223	1.030655296	5.112738439	4.654076098
MIR4314	miRNA	92	0	0	0	0
MIR3616	miRNA	92	0	2.061310592	0	0
MIR4763	miRNA	92	0	1.030655296	0	3.878396748
MIR3917	miRNA	93	0	2.061310592	3.067643063	0
MIR337	miRNA	93	0	0	0	0
MIR6891	miRNA	93	0	0	0	0
MIR3918	miRNA	93	0	0	1.022547688	0
MIR433	miRNA	93	4.321513705	4.122621183	1.022547688	3.102717399
MIR663A	miRNA	93	12.10023837	130.8932226	5.112738439	27.92445659
MIR6857	miRNA	93	0	0	0	0
MIR3688-1	miRNA	93	0	0	0	0
MIR4438	miRNA	93	0	0	0	0
MIR1243	miRNA	93	0	0	0	0
MIR2277	miRNA	93	0	1.030655296	4.090190751	0.77567935
MIR1262	miRNA	93	0	0	0	1.551358699
MIR8086	miRNA	93	370.7858759	829.6775131	426.4023858	630.6273113
MIR5091	miRNA	93	0	0	0	0
MIR4286|MIR4286	miRNA	93	0	0	0	0
MIR3916	miRNA	94	4.321513705	15.45982944	7.157833815	42.66236423
AC104450.1	miRNA	94	77.78724669	152.5369838	79.75871965	141.1736416
MIR632	miRNA	94	0	1.030655296	1.022547688	2.327038049
MIR626	miRNA	94	0	0	0	0
MIR940	miRNA	94	1.728605482	1.030655296	0	0
MIR644A	miRNA	94	0.864302741	2.061310592	1.022547688	3.878396748
MIR585	miRNA	94	0.864302741	1.030655296	0	0.77567935
MIR507	miRNA	94	0	0	0	0
MIR575	miRNA	94	0	2.061310592	2.045095376	0
MIR604	miRNA	94	0	1.030655296	0	0
MIR423	miRNA	94	0	0	0	0
MIR7150	miRNA	94	0	0	0	0
MIR558	miRNA	94	6.050119187	28.85834828	16.360763	21.71902179
MIR4431	miRNA	94	0	0	0	0
MIR335	miRNA	94	0	0	0	0
MIR3678	miRNA	94	0	0	0	0.77567935
MIR509-1|MIR509-2	miRNA	94	0	0	0	0
MIR648	miRNA	94	0	0	0	0
MIR646	miRNA	94	0	2.061310592	0	0
MIR330	miRNA	94	0	0	0	0
MIR432	miRNA	94	0	0	0	0
MIR645	miRNA	94	0.864302741	4.122621183	1.022547688	6.205434797
MIR943	miRNA	94	0.864302741	0	0	2.327038049
MIR3180-3|MIR3180-2|MIR3180-1	miRNA	94	0	0	0	0
MIR802	miRNA	94	0	0	0	0
MIR339	miRNA	94	0	0	1.022547688	0
MIR331	miRNA	94	0	0	0	0
MIR5008	miRNA	94	0	0	0	0
MIR4509-1|MIR4509-3|MIR4509-2	miRNA	94	0	1.030655296	0	0
MIR564|MIR564	miRNA	94	0	1.030655296	1.022547688	2.327038049
MIR662	miRNA	95	0	0	0	0.77567935
MIR5007	miRNA	95	0.864302741	1.030655296	0	3.102717399
MIR620	miRNA	95	50.12955898	122.6479802	47.03719364	89.97880456
MIR628	miRNA	95	0	0	0	0
MIR3914-2	miRNA	95	0.864302741	1.030655296	1.022547688	0
MIR3622B	miRNA	95	0	0	0	0
MIR572	miRNA	95	0.864302741	2.061310592	0	0
MIR517C	miRNA	95	0	0	0	0
MIR4290	miRNA	95	0	0	0	0
MIR6075	miRNA	95	1.728605482	5.153276479	0	0.77567935
MIR340	miRNA	95	0.864302741	3.091965887	0	0.77567935
MIR599	miRNA	95	0	5.153276479	0	0.77567935
MIR548AZ	miRNA	95	4.321513705	15.45982944	3.067643063	8.532472846
MIR8081	miRNA	95	0	0	0	0
MIR609	miRNA	95	0	0	0	0
MIR556	miRNA	95	0	0	0	0
MIR550A3	miRNA	95	2.592908223	0	1.022547688	0.77567935
MIR562	miRNA	95	0	0	2.045095376	1.551358699
MIR346	miRNA	95	0	2.061310592	0	0.77567935
MIR3662	miRNA	95	0	3.091965887	0	0
MIR591	miRNA	95	0	0	0	0
MIR568	miRNA	95	0	0	0	0
MIR613	miRNA	95	0.864302741	1.030655296	0	1.551358699
MIR326	miRNA	95	0	0	0	0
MIR200B	miRNA	95	0	0	0	0.77567935
MIR141	miRNA	95	0	0	0	0
MIR7846	miRNA	96	0	0	0	0
MIR622	miRNA	96	1052.720739	1456.315933	188.1487746	135.7438862
MIR411	miRNA	96	0	0	0	0
MIR1324	miRNA	96	0	0	0	0
MIR650	miRNA	96	0	0	0	0
MIR548AP	miRNA	96	0	3.091965887	0	3.102717399
MIR577	miRNA	96	0	0	0	0.77567935
MIR551B	miRNA	96	2.592908223	4.122621183	3.067643063	1.551358699
MIR640	miRNA	96	0	0	0	0
MIR607	miRNA	96	0.864302741	6.183931775	0	0.77567935
MIR548AO	miRNA	96	0	0	0	0
MIR6125	miRNA	96	0	1.030655296	0	1.551358699
MIR555	miRNA	96	5.185816446	10.30655296	1.022547688	4.654076098
MIR615	miRNA	96	0	0	0	0
MIR595	miRNA	96	0	0	0	0
MIR578	miRNA	96	0	4.122621183	1.022547688	3.102717399
MIR551A	miRNA	96	0	0	0	0
MIR647	miRNA	96	1.728605482	1.030655296	2.045095376	0.77567935
MIR19B2	miRNA	96	0	1.030655296	0	0
[truncated: 1,048 more rows]
